1 **Site-specific analysis reveals candidate cross-kingdom small**  
2 **RNAs, tRNA and rRNA fragments, and signs of fungal RNA**  
3 **phasing in the barley-powdery mildew**  
4 **interaction**

5

6 **Running title:** Site-specific enrichment of host/pathogen small RNAs

7

8 **Stefan Kusch<sup>1</sup>, Mansi Singh<sup>1</sup>, Hannah Thieron<sup>1</sup>, Pietro D. Spanu<sup>1,2,\*</sup>, Ralph Panstruga<sup>1</sup>**

9

10 <sup>1</sup> Unit of Plant Molecular Cell Biology, Institute for Biology I, RWTH Aachen University,  
11 Worringerweg 1, D-52056 Aachen, Germany

12

13 <sup>2</sup> Imperial College, London, United Kingdom

14

15

16 **\* Corresponding author:**

17 Pietro Spanu, +44 207 5945384, [p.spanu@imperial.ac.uk](mailto:p.spanu@imperial.ac.uk)

18

19 **Abstract**

20 The establishment of host-microbe interactions requires molecular communication between  
21 both partners, which involves the mutual transfer of noncoding small RNAs. Previous  
22 evidence suggests that this is also true for the barley powdery mildew disease, which is  
23 caused by the fungal pathogen *Blumeria hordei*. However, previous studies lacked spatial  
24 resolution regarding the accumulation of small RNAs upon host infection by *B. hordei*. Here,  
25 we analysed site-specific small RNA repertoires in the context of the barley-*B. hordei*  
26 interaction. To this end, we dissected infected leaves into separate fractions representing  
27 different sites that are key to the pathogenic process: epiphytic fungal mycelium, infected  
28 plant epidermis, isolated haustoria, a vesicle-enriched fraction from infected epidermis, and  
29 extracellular vesicles. Unexpectedly, we discovered enrichment of specific 31- to 33-base  
30 long 5'-terminal fragments of barley 5.8S ribosomal RNA (rRNA) in extracellular vesicles and  
31 infected epidermis, as well as particular *B. hordei* tRNA fragments in haustoria. We describe  
32 canonical small RNAs from both the plant host and the fungal pathogen that may confer  
33 cross-kingdom RNA interference activity. Interestingly, we found first evidence of phased  
34 small RNAs (phasiRNAs) in *B. hordei*, a feature usually attributed to plants, which may be  
35 associated with the post-transcriptional control of fungal coding genes, pseudogenes, and  
36 transposable elements. Our data suggests a key and possibly site-specific role for cross-  
37 kingdom RNA interference and noncoding RNA fragments in the host-pathogen  
38 communication between *B. hordei* and its host barley.

39

40

41 **Keywords**

42 RNA interference, powdery mildew, barley, *Blumeria*, haustorium, mycelium, extracellular  
43 vesicles, cross-kingdom RNAi, tRNA fragments, rRNA fragments, phased RNA, small RNA

44

45

46 **Abbreviations**

47

|    |          |                                                                                 |
|----|----------|---------------------------------------------------------------------------------|
| 48 | Ago      | Argonaute                                                                       |
| 49 | Dcl      | Dicer-like                                                                      |
| 50 | EPI      | epidermis (colonized by <i>B. hordei</i> but epiphytic fungal mycelium removed) |
| 51 | dsRNA    | double-stranded RNA                                                             |
| 52 | EV       | extracellular vesicle                                                           |
| 53 | FDR      | false discovery rate                                                            |
| 54 | GO       | gene ontology                                                                   |
| 55 | HAU      | haustoria of <i>B. hordei</i>                                                   |
| 56 | miRNA    | micro RNA-like                                                                  |
| 57 | miRNA    | micro RNA                                                                       |
| 58 | MYC      | mycelium of <i>B. hordei</i>                                                    |
| 59 | phasiRNA | phased siRNA                                                                    |

|    |         |                                                      |
|----|---------|------------------------------------------------------|
| 60 | P40     | microsomes from <i>B. hordei</i> -infected epidermis |
| 61 | RNAi    | RNA interference                                     |
| 62 | rDNA    | ribosomal DNA                                        |
| 63 | rRF     | ribosomal RNA-derived small RNA fragment             |
| 64 | rRNA    | ribosomal RNA                                        |
| 65 | sRNA    | small RNA                                            |
| 66 | siRNA   | small interfering RNA                                |
| 67 | tasiRNA | trans-acting short interfering RNA                   |
| 68 | TPM     | transcripts per million                              |
| 69 | tRF     | transfer RNA-derived small RNA fragment              |
| 70 | tRNA    | transfer RNA                                         |
| 71 |         |                                                      |

## 72 Introduction

73

74 All complex multicellular organisms, including plants, require the exchange of information  
75 between cells for development and reproduction, but also need to communicate signals  
76 between each other and to coordinate the response to external stimuli. This exchange is  
77 referred to as either intra- or inter-organismal communication, depending on whether it  
78 takes place between cells of the same organism or between separate organisms. A special  
79 case of inter-organismal communication is the exchange of information between organisms  
80 of different taxa. Examples of this phenomenon in the area of plant-microbe interactions  
81 comprise mutually advantageous symbioses and diseases caused by pathogenic fungi (1, 2).  
82 Gene regulation by non-coding small RNAs (sRNAs) can play an important role in the context  
83 of such plant-microbe encounters (1).

84 In plants, sRNAs are important for regulating and fine-tuning diverse processes including  
85 growth and development, maintenance of genome integrity, epigenetic inheritance, and  
86 facilitating responses to both abiotic and biotic stress (3, 4). Based on their biogenesis and  
87 function, sRNAs can be divided into two major subclasses, micro RNAs (miRNAs) and small-  
88 interfering RNAs (siRNAs, (5)). *Micro RNA (MIR)* genes encode pri-miRNAs, which are further  
89 processed into pre-miRNAs and finally mature miRNAs. In eukaryotes other than mammals  
90 and plants, such as in fungi, it is challenging to prove the presence of *bona fide* miRNAs due  
91 to lack of evidence for the non-functional miRNA precursor strand; for this reason, they are  
92 termed miRNA-like RNAs (miRNAs; (6)). In contrast to miRNAs, siRNAs are generated from  
93 double-stranded DNA molecules of various origins (5). In some cases, miRNAs trigger the  
94 generation of secondary siRNAs, for example phased siRNAs (phasiRNAs; i.e., regularly  
95 spaced siRNAs that derive from a common precursor RNA), which are sometimes associated  
96 with the silencing of transposable elements (7). If the sRNA that triggers the formation of  
97 phasiRNAs is derived from a remote *trans*-acting sRNA locus, it is termed *trans*-acting siRNA  
98 (tasiRNA; (7)). While phasiRNAs and tasiRNAs are well-described in plants, they are largely  
99 unexplored in fungi, as we are aware of only one study reporting their existence in the  
100 fungal kingdom (8).

101 Both classes of sRNAs can induce either transcriptional gene silencing or posttranscriptional  
102 gene silencing of specific target genes, collectively referred to as RNA interference (RNAi;  
103 (9)). Irrespective of the class, biogenesis and function of the sRNA, RNAi involves cleavage of  
104 a double-stranded RNA (dsRNA) molecule by a dicer-like (Dcl) ribonuclease and loading of  
105 the mature sRNA onto an Argonaute (Ago) protein, together forming the RNA-induced  
106 silencing complex (5). Dcl proteins process the dsRNA precursor fragments into smaller  
107 pieces of 21-24 nucleotides or bases. The length of the fragment produced depends on the  
108 specific Dcl proteins, which recognise different types of dsRNA. The fragments are then  
109 bound by Ago proteins that specifically distinguish different sRNA lengths and are associated  
110 with distinct modes of gene silencing. For example, *Arabidopsis thaliana* AGO1 binds 21  
111 base-long miRNAs generated by DCL1 or DCL4 and executes posttranscriptional gene  
112 silencing by cleaving target mRNAs in a sequence-specific manner. By contrast, *A. thaliana*  
113 AGO4 binds almost exclusively 24 base-long siRNAs generated by DCL3. AGO4 then induces  
114 transcriptional gene silencing by triggering DNA methylation, a process referred to as RNA-  
115 dependent DNA methylation (10). In each case, the Ago-bound sRNA determines target

116 specificity through sequence complementarity and the Ago protein is the key effector for  
117 gene silencing. In the context of inter-organismal communication, the phenomenon of  
118 sRNA-triggered trans-species gene silencing has been termed cross-kingdom RNAi. One of  
119 the best studied systems for plant-microbe cross-kingdom RNAi is the *A. thaliana-Botrytis*  
120 *cinerea* pathosystem, where exchange of sRNAs occurs in both directions (11, 12). Once  
121 fungal sRNAs reach plant cells they are loaded onto *A. thaliana* Ago proteins, which carry  
122 out the cleavage of host target transcripts such as those encoding mitogen-activated protein  
123 kinases (11). Similarly, the most abundant *A. thaliana* sRNAs detected in *B. cinerea* cells  
124 originate from tasiRNAs or intergenic loci, and target fungal genes important for  
125 pathogenicity (13).

126 Extracellular vesicles (EVs) may serve as shuttles for inter- and intraorganismal RNA  
127 molecule transfer in the context of plant-microbe interactions (13). The release of EVs and  
128 their contents into the plant apoplast upon pathogen challenge and their delivery to  
129 infection sites was first described over 50 years ago (14, 15). This parallels the situation in  
130 mammalian cells where EVs in the intercellular space target nearby and distant cells and are  
131 important components of intra-organismal communication (16). The EVs interact with  
132 recipient cells to deliver cargo like sRNAs by membrane fusion and vesicle internalisation  
133 (17–19). EVs occur in all pro- and eukaryotic phyla (20). However, it is still unclear whether  
134 EV shuttling is the main mechanism for the delivery of sRNAs in plant-pathogen interactions,  
135 since evidence for the shuttling of sRNAs outside of EVs was recently found in *A. thaliana*  
136 (21).

137 The agronomically important crop barley (*Hordeum vulgare*) is the host plant of the  
138 ascomycete fungus *Blumeria hordei*, previously named *B. graminis* f.sp. *hordei* (22), which  
139 causes the powdery mildew disease on barley. *B. hordei* colonises barley biotrophically and  
140 the obligate relationship between host and pathogen requires tightly controlled gene  
141 regulation. In a previous study, we found that the essential components of the RNAi  
142 machinery are present in *B. hordei* (23). Moreover, we discovered at least 1,250 sRNA loci in  
143 the *B. hordei* genome, of which 524 were predicted to have mRNA targets in the host barley.  
144 Expression of sRNAs in both barley and *B. hordei* is consistent with a role in regulating  
145 transcript abundance in both partners during the interaction (24). In *B. hordei*, miRNAs may  
146 control the mRNA levels of fungal virulence genes whereas barley miRNAs and phasiRNAs  
147 might control transcript levels of components of the plant innate immune system. Inter-  
148 organismal exchange of RNAs is thought to be mediated by membrane-bound vesicles (13).  
149 Interestingly, vesicle-like structures have been observed at the interface between *B. hordei*  
150 infection structures and barley leaf epidermal cells (25, 26); this finding would be consistent  
151 with an exchange of sRNAs mediated by EVs in the context of the barley-powdery mildew  
152 interaction.

153 In this study, we analysed the sRNA spectrum in the *B. hordei* - barley pathosystem. To this  
154 end, we dissected infected leaves into separate fractions representing different sites that  
155 are key to the pathogenic process, i.e., epiphytic fungal mycelium, infected plant epidermis,  
156 isolated haustoria, a vesicle-enriched fraction from infected epidermis, and EVs.  
157 Unexpectedly, we discovered enrichment of specific 31- to 33-base long 5' fragments of  
158 barley 5.8S ribosomal RNA (rRNA) in EVs, vesicles, and infected epidermis, as well as specific  
159 *B. hordei* tRNA fragments in haustoria. We describe canonical sRNAs from both the plant

160 host and the fungal pathogen that may confer cross-kingdom RNAi activity. Interestingly, we  
161 found first evidence of phasiRNAs in *B. hordei*, a feature usually attributed to plants, which  
162 may be associated with the post-transcriptional control of coding genes, pseudogenes, and  
163 transposable elements. Our data suggests a key role for cross-kingdom RNAi and noncoding  
164 RNA fragments in the host-pathogen communication between *B. hordei* and its host barley.

165  
166  
167

## 168 Results

169

### 170 Site-specific sRNA sampling

171 Based on three independent experiments, we isolated total RNA from the following  
172 biological materials (“sites”) of *B. hordei*-infected barley leaves four days after inoculation  
173 (Figure 1, see Materials and Methods for a detailed description of the samples): (1)  
174 Epiphytic fungal mycelium (MYC), (2) infected epidermis without mycelium (EPI), (3) fungal  
175 haustoria (HAU), (4) microsomes of the epidermis without mycelium (P40). In addition, RNA  
176 from (5) apoplastic extracellular vesicles (EV+) were isolated from *B. hordei*-infected barley  
177 leaves three days after inoculation. As a control, we also isolated (6) total RNA from  
178 extracellular vesicles of non-infected plants (EV-). The 18 RNA samples (6 sources, 3  
179 replicates each) were then used to extract RNA, which was subsequently subjected to  
180 Illumina-based short read sequencing at a depth of 30 million (MYC, EPI, HAU, P40) or 20  
181 million (EV+, EV-) reads per sample (Supplementary Table 1).

182

### 183 Distinct rRNA- and tRNA-derived sRNAs are enriched in *B. hordei*- and barley-derived 184 sample materials

185 The length of the trimmed sRNA reads ranged from 15 to 75 bases. However, the majority of  
186 the reads were between 15 and 40 bases long; between 282,734 (2.4%) and 5,432,088  
187 (13.8%) per sample cumulatively accounted for reads between 41-74 bases (Supplementary  
188 Table 2). We determined the sRNA length distribution profiles from the 15 to 40 base reads  
189 of the various samples and found that each of the six biological materials showed a  
190 distinctive and largely reproducible pattern: the sRNAs from mycelium (MYC) exhibited a  
191 bimodal distribution with a prominent peak at 21 and 22 bases, and a much shallower and  
192 broader peak with a maximum at 29-33 bases. Likewise, the epidermal (EPI) samples had a  
193 bimodal size distribution with marked peaks at 21-22 and 32-33 bases, respectively. The  
194 HAU and P40 samples exhibited a broad size range without any outstanding peak, but an  
195 increase in the number of 27-32 bases reads compared to reads below or above this range.  
196 Finally, the two EV sample types (EV- and EV+) exhibited distinctive profiles: the EV+ size  
197 distribution was reminiscent of EPI and MYC samples, with a bimodal distribution and  
198 characteristic peaks at 21-23 and 31-32 bases, respectively. However, the EV- sRNAs showed  
199 a single prominent peak at 31-32 bases (Supplementary Figure 1A).

200 We mapped the sRNA reads to the respective reference genomes of *H. vulgare* IBSCv2 (27)  
201 and *B. hordei* DH14 (28) using bowtie within the ShortStack (29) pipeline. Overall, between  
202 3,715,684 and 32,777,442 reads could be assigned to the *H. vulgare* genome and between  
203 431,626 and 22,069,070 reads to the *B. hordei* genome, respectively (Supplementary Table

204 1). We next determined the number of reads mapping to each of the genomes separately  
205 for the read sizes of 15-40 bases (Supplementary Figure 1B; Supplementary Table 3 and 4).  
206 We noted that reads below 19 bases could not be unequivocally allocated to either  
207 organism by read mapping alone, resulting in >100% total mapping counts. Hence, we  
208 considered reads <19 bases as ambiguous and disregarded these from further read length-  
209 related analysis. We found that the majority of 21-22 base reads in the MYC and EPI samples  
210 derived from the *B. hordei* genome, while reads from the 31-32/32-33 base peaks in the EPI  
211 and EV samples almost exclusively aligned to the genome of *H. vulgare*. The majority of  
212 reads >19 bases from the P40 and EV- samples were from the *H. vulgare* genome, while  
213 reads from the EPI, HAU, and EV+ samples originated from both organisms. Regardless of  
214 the read length, except for the distinct 31/32/33 base peak in reads from *H. vulgare*, the  
215 majority of the reads originated from either coding genes or transposable elements  
216 (Supplementary Figure 2).

217 We next explored the identity and possible molecular origin of the sRNAs from the very  
218 prominent 31-32 base peak in the EV+ and 32-33 base peak in the EPI samples, both from  
219 *B. hordei*-infected barley leaves. Using MMSeqs2 for BLAST against the RNA families (RFAM)  
220 databases of conserved noncoding RNAs (i.e., transfer RNAs, ribosomal RNAs, small  
221 nucleolar RNAs, small nuclear RNAs), we found that >80% of the sequences in these two  
222 sample types corresponded to a specific short fragment of the barley 5.8S rRNA (Figure 2).  
223 This 5.8S rRNA fragment (rRF) was specifically found in 31-32-base long reads in EV+ and EV-  
224 , and 32-33-base long reads in EPI (Supplementary Figure 3). In case of the EV- sample,  
225 approximately 30% of 31-32 base reads match this barley 5.8S rRF, while only <15% of P40  
226 and HAU reads originate from it. Between 15 and 30% of the reads in the MYC and HAU  
227 samples were identified as derived from *B. hordei* 5.8S rRNA (Figure 2). In HAU, *B. hordei*  
228 5.8S rRNA fragments were abundant in reads of 27-32 bases in length (Supplementary  
229 Figure 3). Notably, the vast majority of the 5.8S rRNA-associated reads mapped to the 3'-  
230 end of the molecule in both organisms, even in samples lacking a distinctive peak at 31-33  
231 bases (>90%; Figure 2B and Table 1). We refer to these regions as *H. vulgare* rRNA fragment  
232 *Hvu*-rRF0001 and *B. hordei* rRNA fragment *Bho*-rRF0001 (Figure 2B and Table 2). In case of  
233 *B. hordei*, we found a second less abundant fragment adjacent to *Bho*-rRF0001, called  
234 *Bho*-rRF0002 (Supplementary Figure 3 and Table 2).

235 In the P40 and HAU samples, which had a broad peak from 27 to 32 bases (Supplementary  
236 Figure 1), a large portion of reads was identified as 28S (large subunit, LSU) rRNA-derived  
237 sRNAs (Figure 2 and Supplementary Figure 3). P40 had >60% of barley 28S rRNA-originating  
238 reads, while HAU reads could be mapped to >25% barley and >20% *B. hordei* 28S rRNA  
239 sequences. We aligned these reads in a targeted manner to the 28S LSU rRNAs of *H. vulgare*  
240 and *B. hordei* and noted distinct prominent peaks, suggesting the enrichment of specific 28S  
241 rRFs in *B. hordei*-infected barley plants (Supplementary Figure 4 and 5, Supplementary Table  
242 5 and 6). In case of the barley 28S rRNA, the first peak was approximately at position 2,100-  
243 2,150 (*Hvu*-rRF0002) and the second peak around position 3,760-3,800 (*Hvu*-rRF0003); both  
244 peaks were distinctive in the HAU and P40 samples. The peak corresponding to *Hvu*-rRF0002  
245 was shifted to 2,230-2,270 in EV+ samples (*Hvu*-rRF0004), while the peak at 2,100-2,150 was  
246 somewhat split and shifted to positions 2,340-2,380 in the EV- sample (*Hvu*-rRF0005). For  
247 *B. hordei*, the 28S rRNA-derived sRNAs mapped to a peak at position 430-470 (*Bho*-

248 rRF0003), which is distinctive in the EPI, HAU, and MYC samples. In addition, a second peak  
249 at position 1,620-1,660 (*Bho*-rRF0004) appeared in the samples HAU and P40. Notably, we  
250 detected a peak at position 2,150-2,180 in the EV+ sample, which is probably due to the  
251 high identity between the two 28S rDNA sequences between *H. vulgare* and *B. hordei* in this  
252 position (Supplementary Figure 5D).

253 More than 60% (3,557,695) of the reads from the MYC sample were identified as *B. hordei*  
254 tRNA-derived sRNAs (tRNA fragments (tRFs); Figure 2). Intriguingly, >48% of these appear to  
255 originate from *B. hordei* tRNAs with anticodons for glutamine (Gln) (Figure 2D). The 5'  
256 moiety of the UUG anticodon Gln tRNA accounted for 1,332,676 reads (37%), 424,142 reads  
257 (11.9%) were from the 5' end and 124,372 (3.5%) from the 3' end of the CUG anticodon Gln  
258 tRNA, and 314,017 reads (8.8%) were identified as the 3' moiety of the UUC anticodon Glu  
259 tRNA. Next, we predicted the putative secondary structures and minimum free energy of  
260 the rRNA and tRNA fragments using the Vienna RNAfold webserver (30) to assess if they  
261 would be thermodynamically stable (Supplementary Table 7). Notably, *Hvu*-rRF0001 was  
262 predicted to form a secondary structure that was particularly stable, forming two double-  
263 stranded helices at a free energy of  $-11.9 \text{ kcal mol}^{-1}$  (Supplementary Figure 6). This was  
264 markedly more stable than any other theoretical fragment that could be derived from the  
265 barley rRNA (between  $-1.5$  and  $-4.7 \text{ kcal mol}^{-1}$ ) and also than the *B. hordei* 5.8S rRNA-derived  
266 fragments ( $-5.3$  and  $-3.4 \text{ kcal mol}^{-1}$ , respectively). However, not all abundant rRNA  
267 fragments exhibited low free energy (range between  $-2.4$  and  $-11.9 \text{ kcal mol}^{-1}$ ;  
268 Supplementary Table 7). Similarly, the predicted secondary structures of the *B. hordei* tRNA  
269 fragments ranged from  $-1.7$  to  $-10.4 \text{ kcal mol}^{-1}$  free energy, overall suggesting that the tRNA  
270 and rRNA fragments we observed (Table 2) may assume secondary structures that are  
271 thermodynamically stable, but calculated free energy is insufficient evidence to explain the  
272 high abundance of most fragments in our dataset.

273 To assess if specific rRNA fragments occur frequently in infected plants, we then mined  
274 publicly available sRNA sequencing datasets from barley, wheat (*Triticum aestivum*),  
275 soybean (*Glycine max*), and *Arabidopsis thaliana* under various biotic and abiotic stresses  
276 (see Supplementary Table 8 for all accessions). These data showed that read length  
277 distributions varied between experiments even within the same species (Supplementary  
278 Figure 7). Notably, we did not find striking rRNA enrichment in response to infection or  
279 abiotic stress in this subset of sequencing data (Supplementary Figure 8). The fact that  
280 another *B. hordei* sRNA-seq dataset (24) also lacks evidence for abundant rRNA suggests  
281 that these fragments either appear late in infection (three to four days post inoculation in  
282 our samples versus 48 hours post inoculation in (24)) or are only detectable in sampling  
283 material enriched with infected host cells. Altogether we identified distinctive barley 5.8S,  
284 28S (both barley and *B. hordei*), and *B. hordei* tRNA-derived sRNAs enriched in *B. hordei*-  
285 infected barley samples (Table 2).

286

### 287 **Identification of microRNA-like (miRNA) genes in *B. hordei* and in barley**

288 Next, we used the ShortStack pipeline (Materials and Methods) to annotate and quantify  
289 our sRNA samples. Because *bona fide* miRNAs are difficult to predict in fungi (6), we  
290 identified microRNA-like RNAs (miRNAs) that satisfy all conditions of miRNAs except  
291 detection of the precursor strand. Cumulatively, we identified 2,711 unique *B. hordei* and



292 35,835 unique barley miRNA loci with this pipeline, accounting for 2,558 and 29,987 unique  
293 miRNA sequences, respectively (Supplementary Table 9; Supplementary Files 2-5). Of these,  
294 three *B. hordei* miRNAs and 59 barley sequences were classified as *bona fide* miRNAs by  
295 ShortStack. For *B. hordei*, most miRNAs were detected in the EPI, MYC, HAU, and EV+  
296 samples (more than 200 miRNAs each), reflecting the abundance of fungal reads in these  
297 samples. In case of *H. vulgare*, EPI and MYC samples represented the largest numbers of  
298 miRNAs (more than 5,000 each), followed by the EV-, HAU, and P40 samples.  
299 Then, we determined read counts for miRNA loci in both *H. vulgare* and *B. hordei* using the  
300 read mapping information from ShortStack (Supplementary Table 10 and 11). We analysed  
301 sample relatedness by using non-metric multi-dimensional scaling (NMDS), which collapses  
302 multidimensional information into few dimensions (two in this case; Figure 3). In case of  
303 *H. vulgare*, the three replicates of MYC, EPI, HAU, and P40 each formed distinct clusters,  
304 while the EV+ samples were distinct but only broadly clustered, suggesting stronger  
305 variation between replicates. EV- samples did not show clear clustering, as two data points  
306 were similar to the EPI and MYC samples, and one was similar to the EV+ samples  
307 (Figure 3A). The replicates distributed similarly in case of the *B. hordei* samples, but P40  
308 samples showed a broader distribution and some overlap with the EV+ sample (Figure 3B).  
309 For both *H. vulgare* and *B. hordei*, the samples showed comparable Pearson-based  
310 hierarchical clustering (Figure 3C and 3D) and clustering trends in principal component  
311 analysis (PCA; Supplementary Figure 9); ANOSIM testing confirmed significant sample  
312 differentiation in both *H. vulgare* and *B. hordei* ( $p < 1e-4$ ). EV- replicate three, which  
313 clustered with EV+ samples, also showed the distinct peak of 31-32-base long reads,  
314 enrichment of barley 5.8S rRNAs and *B. hordei* tRNAs, and of 28S rRNA-derived fragments  
315 (Supplementary Figure 10). The 31-32-base peak was also visible in EV- replicate two and  
316 consisted of >25% *B. hordei* 5.8S rRNA-derived and >50% tRNA-derived sRNAs. This suggests  
317 that EV- replicates two and three represent vesicles from unintentionally infected rather  
318 than non-infected barley leaves, and that the *H. vulgare* rRFs only occur due to infection  
319 with *B. hordei* as the only replicate without apparent *B. hordei* sRNAs also lacks the peak at  
320 31-32 bases. Together with the detection of *B. hordei* rRNA-derived reads of 31-33 bases in  
321 length (Figure 2), these analyses suggest that at least one EV- sample was similar to the EV+  
322 samples, another contained a significant number of *B. hordei*-derived sRNAs, and that EV  
323 samples generally exhibited high variation hinting at a possible contamination of one or two  
324 EV- samples and/or a low signal-to-noise ratio in the EV fractions.

325

### 326 **Site-specific accumulation of miRNAs**

327 We performed “weighted gene co-expression network analysis” (WGCNA) to identify  
328 miRNAs associated with MYC, EPI, HAU, P40, and EV+ samples for 22,415 *H. vulgare* and  
329 2,711 *B. hordei* miRNAs (Supplementary Figure 11), and then assigned 11,334 *H. vulgare*  
330 and 2,325 *B. hordei* miRNAs as enriched in compartments with at least 2.5-fold abundance  
331 above the average. 2,496 *H. vulgare* miRNAs were enriched in MYC, 1,137 in EPI, 422 in  
332 HAU, 410 in P40, and 615 in EV+ (Figure 4A). In case of *B. hordei*, 519 miRNAs were  
333 enriched in MYC, 260 in EPI, 108 in HAU, 59 in P40, and 26 in EV+ (Figure 4B). The samples  
334 MYC and EPI also showed considerable overlap of equally abundant miRNAs, as 1,009 *B.*  
335 *hordei* miRNAs and 3,628 *Hvu* miRNAs were more frequent in both samples. Further, 137

336 *B. hordei* miRNAs were associated with MYC, EPI, and HAU. We used psRNAtarget (31) to  
337 predict RNAi targets of *H. vulgare* and *B. hordei* miRNAs. Overall, 3,693 *H. vulgare* miRNAs  
338 had putative targets, i.e., 10,488 endogenous and 1,309 *B. hordei* unique transcripts (Figure  
339 4). Ninety (6.8%) of the possible *B. hordei* target genes code for proteins with a predicted  
340 secretion peptide. In case of *B. hordei* miRNAs, we found that 1,205 miRNAs could target  
341 581 endogenous genes, 50 (8.6%) of which encode proteins with a predicted secretion  
342 peptide, and 1,677 may target transcripts in the host *H. vulgare*. Notably, HAU-specific *B.*  
343 *hordei* miRNAs had 76 potential cross-kingdom targets in *H. vulgare*, but only 23  
344 endogenous targets. These miRNAs exhibited higher average abundance (837 transcripts  
345 per million (TPM) on average) than, e.g., MYC-specific miRNAs (59 TPM average) or all  
346 miRNAs (181 TPM average). The *B. hordei* miRNAs enriched in HAU and P40 (23 miRNAs,  
347 5,768 TPM on average) exhibited a similar pattern, predicted to target altogether 12  
348 *H. vulgare* genes and only one *B. hordei* gene.

349 We then performed global and subset-specific gene ontology (GO) enrichment analysis of  
350 the putative cross-kingdom miRNA targets (Figure 5; Supplementary Table 12 and  
351 Supplementary Table 13). We found significant GO enrichment in three of the *B. hordei*  
352 miRNA cross-kingdom target sets (Figure 5A). Protein phosphorylation-related terms  
353 (GO:0006468 and GO:0016773) were enriched between 3.6- and 12.9-fold in all three of the  
354 miRNA cross-kingdom target sets ( $P_{\text{adj}} < 0.05$ ). “ATP binding” was 1.5-fold enriched ( $P_{\text{adj}} <$   
355  $0.0011$ ) in the predicted cross-kingdom targets of MYC- and EPI-specific *B. hordei* miRNAs.  
356 Two GO terms relating to protein K63-linked deubiquitination (GO:0070536 and  
357 GO:0061578) were 80.9-fold enriched in the putative cross-kingdom targets of *B. hordei*  
358 miRNAs enriched in MYC, EPI, and HAU ( $P_{\text{adj}} < 0.05$ ). Only three *H. vulgare* miRNA cross-  
359 kingdom target sets, containing MYC-specific, EPI-specific, or MYC- and EPI-specific miRNAs,  
360 showed significant enrichment of GO terms (Figure 5B). Two genes targeted by MYC- and  
361 EPI-specific miRNAs had the GO term “microtubule-severing ATPase activity” ( $P_{\text{adj}} < 0.046$ ;  
362 128.9-fold enrichment), while the term “vacuole” was 6.5-fold enriched in the same set ( $P_{\text{adj}}$   
363  $< 0.004$ ). In the MYC-specific set, “ADP binding” was 6.2-fold enriched ( $P_{\text{adj}} < 0.04$ ) and  
364 “nucleoside-triphosphatase activity” 5.1-fold ( $P_{\text{adj}} < 0.02$ ); “ADP binding” was also enriched  
365 in the EPI-specific set (11-fold,  $P_{\text{adj}} < 0.009$ ). The only GO terms enriched in endogenous  
366 miRNA targets of *B. hordei* were related to protein phosphorylation (Supplementary  
367 Figure 11A), exhibiting 4-fold to 11-fold enrichment ( $P_{\text{adj}} < 7e-10$ ) in MYC-, EPI-, MYC- and  
368 EPI-, and MYC/EPI/HAU-specific sets. Conversely, we found 69 enriched GO terms in the sets  
369 of putative endogenous *H. vulgare* target genes Supplementary Figure 11B; Supplementary  
370 Table 12 and Supplementary Table 13). Many of these GO terms relate to regulatory, cell  
371 cycle, growth, and developmental processes.

372 Altogether, we detected that most *B. hordei* and *H. vulgare* miRNAs exhibited site-specific  
373 enrichment patterns, suggestive of their infection stage- and tissue-specific induction.  
374 Among the putative targets of *B. hordei* miRNAs, genes coding for proteins involved in  
375 protein phosphorylation appeared to be consistently overrepresented, both in presumed  
376 endogenous and cross-kingdom gene targets. Predicted targets of *H. vulgare* miRNAs  
377 showed some enrichment of processes related to microtubule-severing ATPase activity in  
378 cross-kingdom *B. hordei* target genes, while endogenously regulating cell cycle, growth, and  
379 development.

380

381 ***B. hordei* shows signs of phasing in coding genes and retrotransposons**

382 In addition to detecting miRNA candidates, ShortStack (29) can suggest loci containing  
383 phased siRNAs (phasiRNAs). Unexpectedly, ShortStack detected that phasiRNAs had  
384 occurred in RNAs from 22 *B. hordei* loci in our dataset, present in samples EPI and MYC but  
385 none of the other samples (phasing score > 30). Of these, two were found in genes encoding  
386 Sgk2 kinases (*BLGH\_05411* and *BLGH\_03674*), which are abundant in the genome of the  
387 fungus (32), including at least one apparent pseudogenized Sgk2 kinase (*BLGH\_03674*;  
388 Figure 6, Supplementary Figure 12). Another four phasing loci corresponded to coding  
389 genes, namely *BLGH\_02275*, *BLGH\_00530*, *BLGH\_00532* (encoding proteins of unknown  
390 function), and *BLGH\_03506* (encoding CYP51/Eburicol 14-alpha-demethylase, involved in  
391 ergosterol biosynthesis). The remaining 16 phasing loci were found to be in  
392 retrotransposons (Supplementary Table 14). Since ShortStack is not optimized for phasiRNA  
393 prediction (29), we used the PHASIS pipeline (33), unitas (34), and PhaseTank (35) to detect  
394 evidence of phasing in the genome of *B. hordei* with our sRNA-seq dataset. PhaseTank failed  
395 to predict any phasiRNAs with our data. However, we detected 153 putative phasing loci  
396 with PHASIS, consisting of 21- or 22-base long phasiRNAs ( $P < 0.0005$ , Supplementary Table  
397 14). We found that nine phasiRNA loci were located in coding genes of *B. hordei*, of which  
398 seven encode Sgk2 kinases. Further, one coding gene subject to phasiRNA enrichment  
399 (*BLGH\_05762*) encoded a putative secreted protein, and another (*BLGH\_00843*) a gene  
400 encoding a protein of unknown function. Nineteen phasing loci were in the intergenic space.  
401 The majority of phasiRNAs were found in retrotransposons of *B. hordei*, i.e., 42 *Tad*, 7  
402 *HaTad*, 23 *Copia*, 29 *Gypsy*, and 23 *NonLTR* retrotransposons (Supplementary Table 14),  
403 accounting for 124 loci altogether. One DNA transposon type *Mariner-2* and one unknown  
404 transposon was found as well. The most sensitive detection method with our data was  
405 unitas (34), which predicted 1,694 unique phasing loci in the genome of *B. hordei*  
406 (Supplementary Table 14). These loci were randomly distributed on the scaffolds of  
407 *B. hordei* (Figure 6A). Of these, 135 were located in coding genes and 1,535 in transposable  
408 elements, while 24 loci were intergenic (Figure 6C). Of the coding genes, 67 encoded Sgk2  
409 kinases, while seven encoded predicted secreted effector proteins. GO terms related to  
410 protein phosphorylation and organonitrogen metabolism were enriched in this set of genes  
411 (Figure 6D). The abundance of phasiRNAs in the different sites varied greatly; for example,  
412 the reads mapping to the Sgk2 kinase locus *BLGH\_03674* were abundant in the MYC and EPI  
413 samples, while much less numerous in HAU and P40. Surprisingly, they were also very  
414 abundant in the EV+ fraction (Supplementary Figure 12).

415  
416  
417

## 418 Discussion

419

420 In this work, we sought to characterise the spectrum of sRNAs present in the context of a  
421 compatible barley-powdery mildew interaction by isolating and sequencing sRNAs from  
422 different “sites” of infected leaves: the epiphytic fungal structures that include the  
423 mycelium, runner hyphae, conidiophores and conidia (MYC), the infected barley epidermis  
424 including plant tissue and the intracellular fungal haustoria (EPI), a fraction enriched of

425 fungal haustoria (HAU), microsomes obtained after lysis of the epidermal cells (P40), and  
426 extracellular vesicles from the apoplast of non-infected (EV-) and infected (EV+) leaves.  
427 The first aim was to determine whether the sRNAs differed between the sites. First, we  
428 discovered abundant and highly specific fragments derived from 5.8S and 28S rRNA of  
429 barley and *B. hordei*, and of tRNAs from *B. hordei* (rRFs and tRFs, respectively; Figure 2 and  
430 Table 2). In most cases, these fragments were of discrete lengths (31-33 bases), derived  
431 from the 3' end of the 5.8S rRNA, specific locations within the 28S rRNA, or represented  
432 tRNA halves. The fragments exhibited highly specific and prominent enrichment at specific  
433 sites of the interaction; thus, they are unlikely to be the product of random RNA  
434 exonuclease degradation. Noncoding RNAs including tRNAs and rRNAs preferentially give  
435 rise to terminal fragments in animals (36, 37), fungi (38), and plants (39). rRFs have been  
436 shown to be involved in ageing in *Drosophila melanogaster* (40), rRNA degradation in  
437 response to erroneous rRNAs and UV irradiation stress in *Caenorhabditis elegans* (41, 42),  
438 and the response to pathogen infection in black pepper (*Piper nigrum*; (39). Many barley  
439 rRFs were abundant in EV+ while not enriched in some EV- samples derived from  
440 noninfected plants (Supplementary Figure 10), suggesting their biogenesis is induced by  
441 fungal infection in barley. By contrast, *B. hordei* 5.8S rRNA-derived rRFs were particularly  
442 abundant in isolated haustoria, suggestive of a role related to the intimate interaction with  
443 the host plant.

444 tRFs appear to be involved in multiple regulatory processes in plants (43). They may play a  
445 role in translation inhibition, since 5'-terminal oligoguanine-containing tRF halves of  
446 *A. thaliana* can inhibit translation *in vitro* (44). They accumulate under various stresses  
447 including phosphate starvation in barley and *A. thaliana* (45, 46) and *Fusarium graminearum*  
448 infection in wheat (47). Further, tRNA halves and 10-16 base tiny tRFs represent substantial  
449 portions of the sRNA pool in *A. thaliana* and may not be random tRNA degradation products  
450 (48). We observed fungal rather than plant tRFs of 31-32 bases specifically in isolated  
451 mycelium (Table 2). Some 28-35-base long tRFs are abundant in appressoria of the rice blast  
452 pathogen *Magnaporthe oryzae* (49), suggesting infection stage- or tissue-specific roles for  
453 these fragments in plant-pathogenic fungi. Intriguingly, the nitrogen-fixing bacterium  
454 *Bradyrhizobium japonicus* exchanges specific tRFs with its host plant soybean, hijacking the  
455 host RNAi machinery and supporting nodulation (50). While our data does not demonstrate  
456 *B. hordei* 31-32 base tRF exchange with the host, we detected tRFs in both infected  
457 epidermis and one EV- sample (Figure 2; Supplementary Figure 10), which hints at some  
458 tRFs occurring in vesicles and infected host cells.

459 An important question is how such rRNA and tRNA fragments arise and how they are  
460 specifically enriched in plants and fungi. Both rRFs and tRFs can be generated by Dicer and  
461 loaded onto Ago. For example, 18-26 base long tRFs accumulate in a DCL1-dependent  
462 manner and mediate Ago-driven cleavage of retrotransposons in *A. thaliana* (51), and 23-  
463 base-long rRFs derived from the 5' end of 5.8S rRNA appear to be associated with AGO1 in  
464 *P. nigrum* (39). In the fungus *Neurospora crassa*, the production of rRFs requires the RNA-  
465 dependent RNA polymerase QDE-1, the helicase QDE-3, and DCL (38). However, the  
466 fragments we observed were longer than 26 nucleotides. Thus, they are unlikely to be  
467 associated with Dicer and Ago proteins. Instead, these specific tRFs and rRFs may have been  
468 generated by specific RNases, like the RNase A Angiogenin in humans (52), the

469 *Saccharomyces cerevisiae* RNase T2 Rny1p (53), and plant RNase T2 (54–56, 47). RNase T2  
470 most likely recognizes and hydrolyses single-stranded rRNA/tRNA loops, which could explain  
471 why the ends of the tRFs and rRFs we observed are always found in single-stranded loops  
472 (Figure 2). However, it is not clear why specific rRFs and tRFs accumulate while the  
473 remaining rRNA and tRNA molecules disappear. We found that these fragments potentially  
474 form novel secondary structures, which may render them inaccessible to RNA exonucleases,  
475 and that the barley 5.8S rRF may be energetically more stable than other fragments derived  
476 from the same molecule (Supplementary Figure 6). However, this is not the case for all rRFs  
477 and tRFs we found, suggesting that predicted thermodynamic stability alone cannot explain  
478 their high abundance. Future research will show if plants and pathogens repurposed specific  
479 fragments of these evolutionary ancient rRNA and tRNA molecules specifically towards  
480 intra- or cross-species communication.

481 Next, we turned our attention to miRNAs and milRNAs; in particular we attempted to  
482 predict possible targets for endogenous and putative cross-kingdom gene regulation by  
483 RNAi. We found that barley milRNAs are predicted to target more endogenous genes than  
484 fungal genes (Figure 5), while *B. hordei* milRNAs are predicted to target more genes cross-  
485 kingdom in barley. This trend was particularly evident in haustoria (76 of 108 milRNAs had  
486 calculated cross-kingdom targets). The most frequent process associated with putative gene  
487 targets for *B. hordei* milRNAs in samples derived from epiphytic mycelium and infected  
488 epidermis is protein phosphorylation. Protein phosphorylation is important during plant  
489 defence, especially for signal transduction (57). In support of this notion, kinases have been  
490 reported as sRNA targets before. For example, *B. cinerea* sRNAs target *A. thaliana* MAP  
491 kinases and cell wall-associated kinases (11). Similarly, sRNAs from the wheat stripe rust  
492 *Puccinia striiformis* f.sp. *tritici* are predicted to target many kinase genes in wheat (58), and  
493 *Fusarium oxysporum mil-R1* interferes with kinases of its host, tomato (59). Although fewer,  
494 there are also potential cross-kingdom targets for barley milRNAs. For example, barley  
495 milRNAs were predicted to target *B. hordei* genes related to microtubule-severing ATPase  
496 activity, ADP binding, and nucleoside triphosphatase activity (Figure 5). Microtubules play  
497 key roles in tip growth of hyphae in fungi, and the severing ATPase activity is essential for  
498 microtubule organization (60, 61). It is therefore possible that plant miRNAs have evolved to  
499 interfere with microtubule dynamics in the fungal pathogen.

500 Remarkably, we also detected *B. hordei* milRNAs in EV+ samples. These milRNAs are unlikely  
501 to be contaminations because a considerable number (26 in total) of *B. hordei* milRNAs that  
502 were specifically enriched in this sample type (Figure 4B). In principle, these EV+-enriched  
503 *B. hordei* milRNAs could originate from *B. hordei*-derived microsomes. However, the  
504 apoplastic space is physically separated from the main plant-fungus interaction site (the  
505 interface between the extrahaustorial membrane and the plant cell wall) by the haustorial  
506 neck band (62), which makes vesicle diffusion of fungal origin into the apoplast unlikely. In  
507 principle, broken cells or breaking of cells or the haustorial neck during sample preparation  
508 are another possibility for the origin of these EVs. Also, during the vacuum infiltration  
509 process to obtain the apoplastic fluid, *B. hordei* EVs could be washed off the leaf surface and  
510 the mycelium. However, there was limited co-enrichment of milRNAs in MYC and EV+  
511 samples (Figure 4), and the EV+-specific milRNAs preclude this scenario. Therefore, it is  
512 possible that *B. hordei* milRNAs hijack barley EVs in a similar manner as the turnip mosaic

513 virus does in *Nicotiana benthamiana* (63). The virus uses this mechanism to disperse its  
514 genetic material. However, this scenario would require the transition of fungal sRNAs  
515 through several stages of endo- and exocytosis.  
516 PhasiRNAs have been well-documented in plants where they are thought to be the result of  
517 complex processes of controlled degradation of double-stranded RNAs; they play roles in a  
518 wide variety of biological functions including development and plant immunity (64).  
519 Conversely, there is only very limited information about phasiRNA in fungi: to the best of  
520 our knowledge the only case where phasiRNAs have been reported in the fungal kingdom is  
521 *Sclerotinia sclerotiorum* infected by a hypovirus (8). We were, therefore, surprised to find a  
522 clear signature of phasiRNA mapping to the fungal genome in *B. hordei* using ShortStack  
523 (Figure 6). We subsequently succeeded in detecting phasiRNAs using two other independent  
524 algorithms (unitas and PHASIS; Figure 6). The different pipelines detected somewhat  
525 different sets of phased loci in the *B. hordei* genome, which likely reflects the different  
526 mapping protocols. PHASIS exhibited the lowest overlap in phasing locations between the  
527 three tools; this is probably because PHASIS does not use already existing mapping files but  
528 performs its own mapping procedure instead. In any case, the low degree of overlap  
529 highlights the suboptimal performance of these tools for the identification of phasiRNA in  
530 filamentous fungi, and improvements may need to be implemented to determine complete  
531 phasiRNA complements in these organisms. The vast majority of phasiRNAs mapped to  
532 repetitive elements in the *B. hordei* genome, i.e., transposons and the previously described  
533 abundant *Sgk2* kinase loci (32). This may result from the involvement of phasiRNAs in  
534 controlling the expression of such genomic elements in the absence of the otherwise highly  
535 conserved repeat-induced point mutation (RIP) pathway (65, 28). In animals, it is thought  
536 that PIWI-associated RNAs (that show analogous phasing to plant phasiRNAs) also function  
537 to control transposons in *Drosophila* (66). Nevertheless, according to our data, some  
538 protein-coding gene loci in *B. hordei* show the presence of phased sRNAs as well, raising the  
539 possibility that the expression of these genes may be subject to regulation by RNAi.  
540 The presence of predicted phasiRNAs of fungal origin in EVs of the leaf apoplast from  
541 infected barley leaves (EV+) is intriguing. It is difficult to rationalise what function, if any,  
542 these may have in modulating plant gene expression at remote sites. We note, however,  
543 that trans-acting small interfering RNA3a RNAs (tasi-RNA) derived from the *A. thaliana*  
544 *TAS3a* locus and synthesized within three hours of pathogen infection may be an early  
545 mobile signal in systemic acquired resistance (67). It is thus conceivable that trafficking of  
546 sRNAs of fungal origin may follow the same route and may target plant gene expression  
547 (24), and that fungal phasiRNAs in plant EVs are simply unintended by-products of this track.  
548 Overall, our findings further support the notion that phasing exists in the fungal kingdom  
549 and additionally provide evidence that transposable elements in *B. hordei* are subject to  
550 sRNA-directed post-transcriptional regulation.

551

552

553

## 554 **Material and Methods**

555

### 556 **Plant cultivation**

557 Plants of barley (*H. vulgare* cv. Margret) were grown in SoMi513 soil (HAWITA, Vechta,  
558 Germany) under a long day cycle (16 h light period at 23 °C, 8 h darkness at 20 °C) at 60-65%  
559 relative humidity and 105-120  $\mu\text{mol s}^{-1} \text{m}^{-2}$  light intensity. Seven-day-old barley plants were  
560 inoculated with *B. hordei* strain K1; the plants were transferred to growth chambers with a  
561 long day cycle (12 h light at 20 °C, 12 h dark at 19 °C) at ca. 60% relative humidity and 100  
562  $\mu\text{mol s}^{-1} \text{m}^{-2}$ .

563

#### 564 **Isolation of small RNAs**

565 Seven-day-old barley was inoculated with *B. hordei* strain K1. At four days after inoculation,  
566 the primary leaves were harvested to isolate mycelia, epiphytic, haustoria, and microsomes  
567 from infected epidermis (P40). The dissection of the tissues and fractions was carried out as  
568 previously described (68). Briefly, this consisted of dipping the excised leaves in cellulose  
569 acetate (5% w/v in acetone), letting the acetone evaporate for a few minutes, peeling first  
570 the epiphytic structures (MYC; this contained epiphytic mycelia, conidia and spores), then  
571 dissecting the adaxial barley epidermis (EPI).

572 A portion of the epidermis samples were subsequently used to extract haustoria (HAU) and  
573 epidermis microsomes (P40). First, the plant cell walls were digested by incubating the  
574 epidermis in “Onozuka” R-10 cellulase (YAKULT pharmaceutical - Duchefa Biochemie BV,  
575 Haarlem, The Netherlands; dissolved in 2% w/v in potassium vesicle isolation buffer; 20 mM  
576 MES, 2 mM  $\text{CaCl}_2$ , 0.1 M KCl, pH 6.0; (69)) for 2 h at 28 °C on a rotary shaker (80 rpm). The  
577 digested epidermis samples were then filtered through a 40  $\mu\text{m}$  nylon mesh sieve and  
578 centrifuged for 20 min at 200 *g*. The pellet containing the haustoria was resuspended in  
579 260  $\mu\text{L}$  potassium vesicle isolation buffer and stored at -80 °C (HAU);  $\sim 1$  to  $2 \times 10^6$  haustoria  
580 were obtained per sample. The supernatant was centrifuged again at 10,000 *g* for 30 min at  
581 4 °C, and the pellet discarded. The resulting supernatant was centrifuged one last time at  
582 40,000 *g* at 4 °C for 1 h; the pellet containing the microsomes was stored at -80 °C (P40).  
583 Apoplastic wash fluid was extracted from barley plants at three days after inoculation with  
584 *B. hordei* strain K1. Trays of both inoculated and non-inoculated plants were covered with  
585 lids and incubated prior to apoplastic wash fluid extraction. Approximately 30 g of leaf fresh  
586 weight were collected and vacuum infiltrated with potassium vesicle isolation buffer. Excess  
587 buffer was carefully removed and the leaves were placed with the cut ends down in 20 mL  
588 syringes. The syringes were inserted into 50 mL centrifuge tubes. Apoplastic wash fluid was  
589 collected at 400 *g* for 12 min at 4 °C. Cellular debris was first removed by passing the  
590 apoplastic wash fluid through a 0.22  $\mu\text{m}$  syringe filter and further by centrifugation at  
591 10,000 *g* for 30 min at 4 °C. A crude extracellular vesicle fraction was isolated from  
592 apoplastic wash fluid based on a previously established protocol (69). The apoplastic wash  
593 fluid was centrifuged for 1 h at 40,000 *g* (4 °C) in a swinging bucket rotor to collect  
594 extracellular vesicles (EV- and EV+). The extracellular vesicle pellet was resuspended in 50  $\mu\text{L}$   
595 20 mM Tris-HCl (pH 7.5).

596 The MYC and EPI samples were ground in liquid nitrogen with quartz sand in a chilled pestle  
597 and mortar and RNA was extracted from all samples using TRIzol (Thermo Scientific,  
598 Schwerte, Germany) as described by the manufacturer. The RNA from all other samples  
599 were extracted by resuspending the frozen samples directly into the TRIzol reagent, and  
600 proceeding as described. The quantity and quality of the RNA was measured by

601 spectrophotometry (NanoDrop, Thermo Scientific) and spectrofluorimetry (Qubit, Thermo  
602 Scientific).

603

#### 604 **sRNA sequencing and data processing**

605 RNA samples were quantified via the Qubit RNA HS Assay (Thermo Scientific), and sized with  
606 a High Sensitivity RNA ScreenTape (Agilent, Santa Clara, CA, USA). Library preparation was  
607 performed with RealSeq-Dual as recommended by the manufacturer (RealSeq Biosciences,  
608 Santa Cruz, CA, USA; (70)) with 100 ng of RNA for each sample. Half the volume of each  
609 library was amplified by 20 cycles of polymerase chain reaction. Libraries from all samples  
610 were pooled for sequencing in the same flow cell of a NextSeq single-end 75 nt reads run.  
611 FastQ files were trimmed of adapter sequences by using Cutadapt (71) with the following  
612 parameters: cutadapt -u 1 -a TGGAATTCTCGGGTGCCAAGG -m 15. We further performed  
613 quality trimming of reads with Trimmomatic v0.39 (72). FASTQ read data were inspected  
614 using FastQC v0.11.5 (Babraham Bioinformatics, Cambridge, UK). FASTQ/FASTA files were  
615 parsed with SeqKit v2.1.0 (73).

616

#### 617 **Read length distribution analysis**

618 We determined read length counts with custom BASH scripts and plotted these data using  
619 ggplot2 v3.3.4 (Wickham 2009) in R v4.1.2 (R Core Team 2021). Reads were mapped to the  
620 reference genomes of *H. vulgare* (Hordeum\_vulgare.IBSC\_v2; (27)) and *B. hordei* DH14 v4  
621 (28) using bowtie within the ShortStack pipeline v3.8.5-1 (29). We used SAMtools v1.9 (74)  
622 in conjunction with custom BASH scripts to parse read mapping statistics. Read counts by  
623 genomic features, i.e., coding genes, transposable elements, and miRNA genes identified by  
624 ShortStack, were determined using featureCounts v2.0.1 (76). *H. vulgare* transposable  
625 elements were identified with RepeatMasker v4.0.7 (<http://www.repeatmasker.org>) using  
626 the repeat database version RepBase-20170127 and '-species Hordeum'. The data were  
627 plotted with ggplot2 v3.3.4 (77) in R v4.1.2 (78).

628

#### 629 **Read BLAST searches**

630 We used a custom python script to generate FASTA files containing reads of 21-22 bases, 31-  
631 32 bases, and 32-33 bases, respectively, and then deduplicated reads using clumpify.sh of  
632 the BBmap package (<https://jgi.doe.gov/data-and-tools/software-tools/bbtools/>). We  
633 downloaded the ribosomal and transfer RNA molecules deposited in the RFAM database  
634 ([http://ftp.ebi.ac.uk/pub/databases/Rfam/CURRENT/fasta\\_files/](http://ftp.ebi.ac.uk/pub/databases/Rfam/CURRENT/fasta_files/)) in October 2021. All reads  
635 were aligned to the RFAM databases using MMSeqs2 v9.d36de (Steinegger and Söding  
636 2017). Reads aligning to RF02543 (28S rRNA) were subsequently aligned to the 28S rRNA  
637 sequences of *H. vulgare* (RNAcentral accession URS0002132C2A\_4513) and *B. hordei*  
638 (URS0002174482\_62688), respectively. Read alignment coverage was determined via  
639 BEDtools v2.25.0 (75). Bar graphs and histograms displaying these data were plotted with  
640 ggplot2 v3.3.4 (77) in R v4.1.2 (78).

641

#### 642 **Structure and free energy analysis of rRNA and tRNA fragments**

643 We obtained rRNA and tRNA structures predicted by R2DT from RNA central  
644 (<https://rnacentral.org>) and visualized the structures with Forna (79). We further used



645 Vienna RNAfold v2.4.18 webserver (30) to calculate secondary structures and their  
646 minimum free energy (MFE) of 5.8S rRNAs, rRNA, and tRNA fragments.

647

#### 648 **Identification of miRNAs**

649 We used ShortStack pipeline v3.8.5-1 (29) to predict miRNAs in the genomes of *H. vulgare*  
650 (*Hordeum\_vulgare*.IBSC\_v2; (27)) and *B. hordei* DH14 (28). Small RNAs with a Dicer Call cut-  
651 off of N15 were considered as microRNA-like (miRNA) RNAs. We collected non-redundant  
652 *B. hordei* and *H. vulgare* miRNAs and miRNAs in GFF and FASTA formats in Supplementary  
653 files 2-5. featureCounts v2.0.1 (76) was used to determine miRNA locus-specific read  
654 counts.

655

#### 656 **Quantification and clustering of miRNA expression**

657 We first analysed similarities/differences between samples using several statistical  
658 approaches. Non-metric multi-dimensional scaling (NMDS) collapses multidimensional  
659 information into fewer dimensions and does not require normal distribution. The stress  
660 value represented the statistical fit of the model for the data. Stress values equal to or  
661 below 0.05 indicated a good model fit. We complemented the NMDS analysis with metric  
662 multi-dimensional scaling (MDS), principal component (PC) analysis, and Pearson coefficient  
663 correlation (PCC)-based hierarchical clustering. In addition, non-parametric rank-based  
664 ANOSIM (analysis of similarity) tests were performed to determine statistical differences  
665 between samples.

666 Weighted gene coexpression network analysis (WGCNA; (80)) was performed using read  
667 counts mapping to miRNA loci. First, we filtered out the non-expressed genes (cut-off  
668 TPM < 1), leaving 22,415 *H. vulgare* and 2,217 *B. hordei* miRNAs for the construction of the  
669 coexpression networks. The scale-free network distribution required determination of the  
670 soft threshold  $\beta$  (12 for *H. vulgare* and 16 for *B. hordei*) of the adjacency matrix. A module  
671 correlation of 0.1 with either sample was the cut-off for identifying miRNAs enriched in the  
672 samples MYC, EPI, HAU, P40, and EV+; we then refined assignment of miRNAs to samples at  
673 >2.5-fold above average expression across samples. We used pairwise differential  
674 expression analysis with DESeq2 (81), EdgeR (82), and limma-VOOM (83) to confirm the  
675 overall expression trends of miRNAs from *H. vulgare* and *B. hordei*. Intersections were  
676 analyzed by UpSetR plots using ComplexUpset (84).

677

#### 678 **Small RNA target prediction and GO enrichment of miRNA target sets**

679 We used psRNAtarget (<https://www.zhaolab.org/psRNATarget>) Schema V2 2017 release  
680 (31) at an expectation value cut-off of 2. We performed GO enrichment on putative miRNA  
681 target gene sets using ShinyGO v0.75 (85); *P* values indicated were calculated via false  
682 discovery rate (FDR) correction ( $P_{adj}$ ). GO terms were summarized by removing redundant  
683 GO terms with EMBL-EBI QuickGO (<https://www.ebi.ac.uk/QuickGO/>) on GO version 2022-  
684 04-26 and REVIGO (86) with Gene Ontology database and UniProt-to-GO mapping database  
685 from the EBI GOA project versions from November 2021.

686

#### 687 **PhasiRNA and tasiRNA detection in *B. hordei***

688 We used ShortStack pipeline v3.8.5-1 (29), the PHASIS pipeline (33), unitas v1.7.0 (34), and  
689 PhaseTank v1.0 (35) to detect evidence of phasing in the genome of *B. hordei* with our small

690 RNA-seq dataset. Detected phasing sites were concatenated to non-redundant phasing loci  
691 using BEDtools v2.25.0 (Quinlan and Hall 2010). Manual inspection of phasing loci was done  
692 using Integrative Genomics Viewer (87).

693

694

695

696

### 697 **Author contributions**

698 P.D.S. conceived and conceptualized the project, generated materials (HAU, P40, EPI, MYC),  
699 and performed initial analysis of the sRNA-seq data. S.K. contributed to initial data analysis  
700 and miRNA identification, performed read length distribution analysis in the samples from  
701 this study and published data, analysed miRNA expression data, contributed to GO  
702 enrichment analysis, did phasiRNA detection in *B. hordei*, and designed figures. M.S.  
703 contributed to miRNA identification, read length distribution analysis, secondary structure  
704 predictions of RNA fragments, weighted correlation network analysis of miRNAs, performed  
705 miRNA target predictions, and gene ontology enrichment analysis. H.T. generated materials  
706 from EV samples. S.K., H.T., and P.D.S. drafted the manuscript, all authors edited the  
707 document. P.D.S. and R.P. provided reagents, funds, and laboratory space. All authors read  
708 and agreed to the final version of the manuscript.

709

### 710 **Data availability statement**

711 The sRNA sequencing data are deposited at NCBI/ENA/DDBJ under project accession  
712 PRJNA809109; the SRA accessions are listed in Supplementary Table 1. The *B. hordei* and  
713 *H. vulgare* miRNAs and miRNAs are available in GFF format and FASTA format in  
714 Supplementary files 2-5.

715

### 716 **Code availability statement**

717 All computational tools and their versions are described in the respective methods sections,  
718 and were run in default mode with modifications indicated. Custom codes for our analysis  
719 pipeline are available at [https://github.com/stefankusch/smallRNA\\_seq\\_analysis](https://github.com/stefankusch/smallRNA_seq_analysis).

720

### 721 **Acknowledgments**

722 We thank Blake Meyers for advice on the usage of PHASIS, and members of the DFG-funded  
723 FOR5116 consortium for critical feedback. The analysis was performed with computing  
724 resources granted by RWTH Aachen University under project ID rwth0146.

725

### 726 **Funding**

727 P.D.S. was funded by a research fellowship from the Leverhulme Trust (RF-2019-053), a  
728 research award by the Alexander von Humboldt Foundation (GBR 1204122 GSA), and a  
729 Theodore von Kármán Fellowship (RWTH Aachen). H.T. was supported by the RWTH Aachen  
730 scholarship for doctoral students. The work was further supported by the Deutsche  
731 Forschungsgemeinschaft (DFG, German Research Foundation) project number 433194101  
732 [grant PA 861/22-1 to R.P.] in the context of the Forschergruppe consortium FOR5116  
733 “exRNA” and project number 274444799 [grant 861/14-2 awarded to R.P.] in the context of

734 the DFG-funded priority program SPP1819 “Rapid evolutionary adaptation – potential and  
735 constraints”.

736

737

## 738 References

- 739 1. Ma X, Wiedmer J, Palma-Guerrero J. 2019. Small RNA bidirectional crosstalk during the  
740 interaction between wheat and *Zymoseptoria tritici*. *Front Plant Sci* 10:1669.  
741 doi:10.3389/fpls.2019.01669.
- 742 2. Wong-Bajracharya J, Singan VR, Monti R, Plett KL, Ng V, Grigoriev IV, Martin FM, Anderson IC,  
743 Plett JM. 2022. The ectomycorrhizal fungus *Pisolithus microcarpus* encodes a microRNA  
744 involved in cross-kingdom gene silencing during symbiosis. *Proc Natl Acad Sci USA* 119.  
745 doi:10.1073/pnas.2103527119.
- 746 3. Klesen S, Hill K, Timmermans MCP. 2020. Small RNAs as plant morphogens. *Curr Top Dev Biol*  
747 137:455–480. doi:10.1016/bs.ctdb.2019.11.001.
- 748 4. Chen X, Rechavi O. 2022. Plant and animal small RNA communications between cells and  
749 organisms. *Nat. Rev. Mol. Cell Biol.* 23:185–203. doi:10.1038/s41580-021-00425-y.
- 750 5. Bologna NG, Voinnet O. 2014. The diversity, biogenesis, and activities of endogenous silencing  
751 small RNAs in *Arabidopsis*. *Annu Rev Plant Biol* 65:473–503. doi:10.1146/annurev-arplant-  
752 050213-035728.
- 753 6. Lee H-C, Li L, Gu W, Xue Z, Crosthwaite SK, Pertsemlidis A, Lewis ZA, Freitag M, Selker EU, Mello  
754 CC, Liu Y. 2010. Diverse pathways generate microRNA-like RNAs and Dicer-independent small  
755 interfering RNAs in fungi. *Mol. Cell* 38:803–814. doi:10.1016/j.molcel.2010.04.005.
- 756 7. Komiya R. 2017. Biogenesis of diverse plant phasiRNAs involves an miRNA-trigger and Dicer-  
757 processing. *J Plant Res* 130:17–23. doi:10.1007/s10265-016-0878-0.
- 758 8. Lee Marzano S-Y, Neupane A, Domier L. 2018. Transcriptional and small RNA responses of the  
759 white mold fungus *Sclerotinia sclerotiorum* to infection by a virulence-attenuating hypovirus.  
760 *Viruses* 10. doi:10.3390/v10120713.
- 761 9. Fire A, Xu S, Montgomery MK, Kostas SA, Driver SE, Mello CC. 1998. Potent and specific genetic  
762 interference by double-stranded RNA in *Caenorhabditis elegans*. *Nature* 391:806–811.  
763 doi:10.1038/35888.
- 764 10. Fukudome A, Fukuhara T. 2017. Plant dicer-like proteins: double-stranded RNA-cleaving  
765 enzymes for small RNA biogenesis. *J Plant Res* 130:33–44. doi:10.1007/s10265-016-0877-1.
- 766 11. Weiberg A, Wang M, Lin F-M, Zhao H, Zhang Z, Kaloshian I, Huang H-D, Jin H. 2013. Fungal small  
767 RNAs suppress plant immunity by hijacking host RNA interference pathways. *Science* 342:118–  
768 123. doi:10.1126/science.1239705.
- 769 12. Wang M, Weiberg A, Lin F-M, Thomma BPHJ, Huang H-D, Jin H. 2016. Bidirectional cross-  
770 kingdom RNAi and fungal uptake of external RNAs confer plant protection. *Nat Plants* 2:16151.  
771 doi:10.1038/nplants.2016.151.
- 772 13. Cai Q, Qiao L, Wang M, He B, Lin F-M, Palmquist J, Huang H-D, Jin H. 2018. Plants send small  
773 RNAs in extracellular vesicles to fungal pathogen to silence virulence genes. *Science* 360:1126-  
774 1129. doi:10.1126/science.aar4142.
- 775 14. He B, Hamby R, Jin H. 2021. Plant extracellular vesicles: Trojan horses of cross-kingdom warfare.  
776 *FASEB Bioadv* 3:657–664. doi:10.1096/fba.2021-00040.
- 777 15. Manocha MS, Shaw M. 1964. Occurrence of lomasomes in mesophyll cells of ‘Khapli’ wheat.  
778 *Nature* 203:1402–1403. doi:10.1038/2031402b0.

- 779 16. Skokos D, Le Panse S, Villa I, Rousselle JC, Peronet R, David B, Namane A, Mécheri S. 2001. Mast  
780 cell-dependent B and T lymphocyte activation is mediated by the secretion of immunologically  
781 active exosomes. *J. Immunol.* 166:868–876. doi:10.4049/jimmunol.166.2.868.
- 782 17. Segura E, Guérin C, Hogg N, Amigorena S, Théry C. 2007. CD8<sup>+</sup> dendritic cells use LFA-1 to  
783 capture MHC-peptide complexes from exosomes in vivo. *J. Immunol.* 179:1489–1496.  
784 doi:10.4049/jimmunol.179.3.1489.
- 785 18. Morelli AE, Larregina AT, Shufesky WJ, Sullivan MLG, Stolz DB, Papworth GD, Zahorchak AF,  
786 Logar AJ, Wang Z, Watkins SC, Falo LD, Thomson AW. 2004. Endocytosis, intracellular sorting,  
787 and processing of exosomes by dendritic cells. *Blood* 104:3257–3266. doi:10.1182/blood-2004-  
788 03-0824.
- 789 19. Parolini I, Federici C, Raggi C, Lugini L, Palleschi S, Milito A de, Coscia C, Iessi E, Logozzi M,  
790 Molinari A, Colone M, Tatti M, Sargiacomo M, Fais S. 2009. Microenvironmental pH is a key  
791 factor for exosome traffic in tumor cells. *J. Biol. Chem.* 284:34211–34222.  
792 doi:10.1074/jbc.M109.041152.
- 793 20. Woith E, Fuhrmann G, Melzig MF. 2019. Extracellular vesicles-connecting kingdoms. *Int J Mol*  
794 *Sci* 20. doi:10.3390/ijms20225695.
- 795 21. Zand Karimi H, Baldrich P, Rutter BD, Borniego L, Zajt KK, Meyers BC, Innes RW. 2022.  
796 Arabidopsis apoplasmic fluid contains sRNA- and circular RNA-protein complexes that are  
797 located outside extracellular vesicles. *Plant Cell* 34:1863–1881. doi:10.1093/plcell/koac043.
- 798 22. Liu M, Braun U, Takamatsu S, Hambleton S, Shoukouhi P, Bisson KR, Hubbard K. 2021.  
799 Taxonomic revision of *Blumeria* based on multi-gene DNA sequences, host preferences and  
800 morphology. *Mycoscience* 62:143–165. doi:10.47371/mycosci.2020.12.003.
- 801 23. Kusch S, Frantzeskakis L, Thieron H, Panstruga R. 2018. Small RNAs from cereal powdery mildew  
802 pathogens may target host plant genes. *Fungal Biol.* 122:1050–1063.  
803 doi:10.1016/j.funbio.2018.08.008.
- 804 24. Hunt M, Banerjee S, Surana P, Liu M, Fuerst G, Mathioni S, Meyers BC, Nettleton D, Wise RP.  
805 2019. Small RNA discovery in the interaction between barley and the powdery mildew  
806 pathogen. *BMC Genomics* 20:345. doi:10.1186/s12864-019-5947-z.
- 807 25. Hippe S. 1985. Ultrastructure of haustoria of *Erysiphe graminis* f. sp. *hordei* preserved by  
808 freeze-substitution. *Protoplasma* 129:52–61. doi:10.1007/BF01282305.
- 809 26. An QL, Ehlers K, Kogel KH, van Bel AJE, Huckelhoven R. 2006. Multivesicular compartments  
810 proliferate in susceptible and resistant MLA12-barley leaves in response to infection by the  
811 biotrophic powdery mildew fungus. *New Phytol.* 172:563–576.
- 812 27. Mascher M, Gundlach H, Himmelbach A, Beier S, Twardziok SO, Wicker T, Radchuk V, Dockter C,  
813 Hedley PE, Russell J, Bayer M, Ramsay L, Liu H, Haberer G, Zhang X-Q, Zhang Q, Barrero RA, Li L,  
814 Taudien S, Groth M, Felder M, Hastie A, Simkova H, Stankova H, Vrana J, Chan S, Munoz-  
815 Amatriain M, Ounit R, Wanamaker S, Bolser D, Colmsee C, Schmutzer T, Aliyeva-Schnorr L,  
816 Grasso S, Tanskanen J, Chailyan A, Sampath D, Heavens D, Clissold L, Cao S, Chapman B, Dai F,  
817 Han Y, Li H, Li X, Lin C, McCooke JK, Tan C, Wang P, Wang S, Yin S, Zhou G, Poland JA, Bellgard  
818 MI, Borisjuk L, Houben A, Dolezel J, Ayling S, Lonardi S, Kersey P, Langridge P, Muehlbauer GJ,  
819 Clark MD, Caccamo M, Schulman AH, Mayer KFX, Platzer M, Close TJ, Scholz U, Hansson M,  
820 Zhang G, Braumann I, Spannagl M, Li C, Waugh R, Stein N. 2017. A chromosome conformation  
821 capture ordered sequence of the barley genome. *Nature* 544:427–433.  
822 doi:10.1038/nature22043.
- 823 28. Frantzeskakis L, Kracher B, Kusch S, Yoshikawa-Maekawa M, Bauer S, Pedersen C, Spanu PD,  
824 Maekawa T, Schulze-Lefert P, Panstruga R. 2018. Signatures of host specialization and a recent  
825 transposable element burst in the dynamic one-speed genome of the fungal barley powdery  
826 mildew pathogen. *BMC Genomics* 19:27. doi:10.1186/s12864-018-4750-6.

- 827 29. Johnson NR, Yeoh JM, Coruh C, Axtell MJ. 2016. Improved placement of multi-mapping small  
828 RNAs. *G3* 6:2103–2111. doi:10.1534/g3.116.030452.
- 829 30. Gruber AR, Lorenz R, Bernhart SH, Neuböck R, Hofacker IL. 2008. The Vienna RNA websuite.  
830 *Nucleic Acids Res* 36:W70-4. doi:10.1093/nar/gkn188.
- 831 31. Dai X, Zhao PX. 2011. psRNATarget: A plant small RNA target analysis server. *Nucleic Acids Res*  
832 39:W155-9. doi:10.1093/nar/gkr319.
- 833 32. Kusch S, Ahmadinejad N, Panstruga R, Kuhn H. 2014. *In silico* analysis of the core signaling  
834 proteome from the barley powdery mildew pathogen (*Blumeria graminis* f.sp. *hordei*). *BMC*  
835 *Genomics* 15:843. doi:10.1186/1471-2164-15-843.
- 836 33. Kakrana A, Li P, Patel P, Hammond R, Anand D, Mathioni SM, Meyers BC. 2017. PHASIS : A  
837 computational suite for de novo discovery and characterization of phased, siRNA-generating  
838 loci and their miRNA triggers. bioRxiv. doi:10.1101/158832.
- 839 34. Gebert D, Hewel C, Rosenkranz D. 2017. unitas: The universal tool for annotation of small RNAs.  
840 *BMC Genomics* 18:644. doi:10.1186/s12864-017-4031-9.
- 841 35. Guo Q, Qu X, Jin W. 2015. PhaseTank: Genome-wide computational identification of phasiRNAs  
842 and their regulatory cascades. *Bioinformatics* 31:284–286. doi:10.1093/bioinformatics/btu628.
- 843 36. Li Z, Ender C, Meister G, Moore PS, Chang Y, John B. 2012. Extensive terminal and asymmetric  
844 processing of small RNAs from rRNAs, snoRNAs, snRNAs, and tRNAs. *Nucleic Acids Res* 40:6787–  
845 6799. doi:10.1093/nar/gks307.
- 846 37. Chen Z, Sun Y, Yang X, Wu Z, Guo K, Niu X, Wang Q, Ruan J, Bu W, Gao S. 2017. Two featured  
847 series of rRNA-derived RNA fragments (rRFs) constitute a novel class of small RNAs. *PLoS One*  
848 12:e0176458. doi:10.1371/journal.pone.0176458.
- 849 38. Lee H-C, Chang S-S, Choudhary S, Aalto AP, Maiti M, Bamford DH, Liu Y. 2009. qiRNA is a new  
850 type of small interfering RNA induced by DNA damage. *Nature* 459:274–277.  
851 doi:10.1038/nature08041.
- 852 39. Asha S, Soniya EV. 2017. The sRNAome mining revealed existence of unique signature small  
853 RNAs derived from 5.8SrRNA from *Piper nigrum* and other plant lineages. *Sci Rep* 7:41052.  
854 doi:10.1038/srep41052.
- 855 40. Guan L, Grigoriev A. 2020. Age-related argonaute loading of ribosomal RNA fragments.  
856 *MicroRNA* 9:142–152. doi:10.2174/2211536608666190920165705.
- 857 41. Zhou X, Feng X, Mao H, Li M, Xu F, Hu K, Guang S. 2017. RdRP-synthesized antisense ribosomal  
858 siRNAs silence pre-rRNA via the nuclear RNAi pathway. *Nat Struct Mol Biol* 24:258–269.  
859 doi:10.1038/nsmb.3376.
- 860 42. Zhu C, Yan Q, Weng C, Hou X, Mao H, Liu D, Feng X, Guang S. 2018. Erroneous ribosomal RNAs  
861 promote the generation of antisense ribosomal siRNA. *Proc Natl Acad Sci USA* 115:10082–  
862 10087. doi:10.1073/pnas.1800974115.
- 863 43. Alves CS, Nogueira FTS. 2021. Plant small RNA world growing bigger: tRNA-derived fragments,  
864 longstanding players in regulatory processes. *Front Mol Biosci* 8:638911.  
865 doi:10.3389/fmolb.2021.638911.
- 866 44. Lalande S, Merret R, Salinas-Giegé T, Drouard L. 2020. Arabidopsis tRNA-derived fragments as  
867 potential modulators of translation. *RNA Biol* 17:1137–1148.  
868 doi:10.1080/15476286.2020.1722514.
- 869 45. Hackenberg M, Huang P-J, Huang C-Y, Shi B-J, Gustafson P, Langridge P. 2013. A comprehensive  
870 expression profile of microRNAs and other classes of non-coding small RNAs in barley under  
871 phosphorous-deficient and -sufficient conditions. *DNA Res* 20:109–125.  
872 doi:10.1093/dnares/dss037.

- 873 46. Hsieh L-C, Lin S-I, Shih AC-C, Chen J-W, Lin W-Y, Tseng C-Y, Li W-H, Chiou T-J. 2009. Uncovering  
874 small RNA-mediated responses to phosphate deficiency in Arabidopsis by deep sequencing.  
875 Plant Physiol 151:2120–2132. doi:10.1104/pp.109.147280.
- 876 47. Sun Z, Hu Y, Zhou Y, Jiang N, Hu S, Li L, Li T. 2022. tRNA-derived fragments from wheat are  
877 potentially involved in susceptibility to Fusarium head blight. BMC Plant Biol 22:3.  
878 doi:10.1186/s12870-021-03393-9.
- 879 48. Ma X, Liu C, Kong X, Liu J, Zhang S, Liang S, Luan W, Cao X. 2021. Extensive profiling of the  
880 expressions of tRNAs and tRNA-derived fragments (tRFs) reveals the complexities of tRNA and  
881 tRF populations in plants. Sci China Life Sci 64:495–511. doi:10.1007/s11427-020-1891-8.
- 882 49. Nunes CC, Gowda M, Sailsbery J, Xue M, Chen F, Brown DE, Oh Y, Mitchell TK, Dean RA. 2011.  
883 Diverse and tissue-enriched small RNAs in the plant pathogenic fungus, *Magnaporthe oryzae*.  
884 BMC Genomics 12:288. doi:10.1186/1471-2164-12-288.
- 885 50. Ren B, Wang X, Duan J, Ma J. 2019. Rhizobial tRNA-derived small RNAs are signal molecules  
886 regulating plant nodulation. Science 365:919–922. doi:10.1126/science.aav8907.
- 887 51. Martinez G, Choudury SG, Slotkin RK. 2017. tRNA-derived small RNAs target transposable  
888 element transcripts. Nucleic Acids Res 45:5142–5152. doi:10.1093/nar/gkx103.
- 889 52. Yamasaki S, Ivanov P, Hu G-F, Anderson P. 2009. Angiogenin cleaves tRNA and promotes stress-  
890 induced translational repression. J. Cell Biol. 185:35–42. doi:10.1083/jcb.200811106.
- 891 53. Thompson DM, Parker R. 2009. The RNase Rny1p cleaves tRNAs and promotes cell death during  
892 oxidative stress in *Saccharomyces cerevisiae*. J. Cell Biol. 185:43–50.  
893 doi:10.1083/jcb.200811119.
- 894 54. Singh NK, Paz E, Kutsher Y, Reuveni M, Lers A. 2020. Tomato T2 ribonuclease LE is involved in  
895 the response to pathogens. Mol Plant Pathol 21:895–906. doi:10.1111/mpp.12928.
- 896 55. Megel C, Hummel G, Lalande S, Ubrig E, Cognat V, Morelle G, Salinas-Giegé T, Duchêne A-M,  
897 Maréchal-Drouard L. 2019. Plant RNases T2, but not Dicer-like proteins, are major players of  
898 tRNA-derived fragments biogenesis. Nucleic Acids Res 47:941–952. doi:10.1093/nar/gky1156.
- 899 56. Alves CS, Vicentini R, Duarte GT, Pinoti VF, Vincentz M, Nogueira FTS. 2017. Genome-wide  
900 identification and characterization of tRNA-derived RNA fragments in land plants. Plant Mol.  
901 Biol. 93:35–48. doi:10.1007/s11103-016-0545-9.
- 902 57. Park C-J, Caddell DF, Ronald PC. 2012. Protein phosphorylation in plant immunity: Insights into  
903 the regulation of pattern recognition receptor-mediated signaling. Front Plant Sci 3:177.  
904 doi:10.3389/fpls.2012.00177.
- 905 58. Mueth NA, Ramachandran SR, Hulbert SH. 2015. Small RNAs from the wheat stripe rust fungus  
906 (*Puccinia striiformis* f.sp. *tritici*). BMC Genomics 16:718. doi:10.1186/s12864-015-1895-4.
- 907 59. Ji H-M, Mao H-Y, Li S-J, Feng T, Zhang Z-Y, Cheng L, Luo S-J, Borkovich KA, Ouyang S-Q. 2021.  
908 *Fol*-milR1, a pathogenicity factor of *Fusarium oxysporum*, confers tomato wilt disease resistance  
909 by impairing host immune responses. New Phytol. doi:10.1111/nph.17436.
- 910 60. Horio T. 2007. Role of microtubules in tip growth of fungi. J Plant Res 120:53–60.  
911 doi:10.1007/s10265-006-0043-2.
- 912 61. Roll-Mecak A, McNally FJ. 2010. Microtubule-severing enzymes. Curr. Opin. Cell Biol. 22:96–  
913 103. doi:10.1016/j.ceb.2009.11.001.
- 914 62. Micali CO, Neumann U, Grunewald D, Panstruga R, O'Connell R. 2011. Biogenesis of a  
915 specialized plant-fungal interface during host cell internalization of *Golovinomyces orontii*  
916 haustoria. Cell Microbiol. 13:210–226.
- 917 63. Movahed N, Cabanillas DG, Wan J, Vali H, Laliberté J-F, Zheng H. 2019. Turnip Mosaic Virus  
918 components are released into the extracellular space by vesicles in infected leaves. Plant  
919 Physiol 180:1375–1388. doi:10.1104/pp.19.00381.

- 920 64. Liu Y, Teng C, Xia R, Meyers BC. 2020. PhasiRNAs in plants: Their biogenesis, genic sources, and  
921 roles in stress responses, development, and reproduction. *Plant Cell* 32:3059–3080.  
922 doi:10.1105/tpc.20.00335.
- 923 65. Spanu PD, Abbott JC, Amselem J, Burgis TA, Soanes DM, Stüber K, van Themaat EVL, Brown  
924 JKM, Butcher SA, Gurr SJ, Lebrun MH, Ridout CJ, Schulze-Lefert P, Talbot NJ, Ahmadinejad N,  
925 Ametz C, Barton GR, Benjdia M, Bidzinski P, Bindschedler LV, Both M, Brewer MT, Cadle-  
926 Davidson L, Cadle-Davidson MM, Collemare J, Cramer R, Frenkel O, Godfrey D, Harriman J,  
927 Hoede C, King BC, Klages S, Kleemann J, Knoll D, Koti PS, Kreplak J, Lopez-Ruiz FJ, Lu XL,  
928 Maekawa T, Mahanil S, Micali C, Milgroom MG, Montana G, Noir S, O'Connell RJ, Oberhaensli S,  
929 Parlange F, Pedersen C, Quesneville H, Reinhardt R, Rott M, Sacristan S, Schmidt SM, Schön M,  
930 Skamnioti P, Sommer H, Stephens A, Takahara H, Thordal-Christensen H, Vigouroux M, Weßling  
931 R, Wicker T, Panstruga R. 2010. Genome expansion and gene loss in powdery mildew fungi  
932 reveal tradeoffs in extreme parasitism. *Science* 330:1543–1546.
- 933 66. Kotov AA, Adashev VE, Godneeva BK, Ninova M, Shatskikh AS, Bazylev SS, Aravin AA, Olenina  
934 LV. 2019. piRNA silencing contributes to interspecies hybrid sterility and reproductive isolation  
935 in *Drosophila melanogaster*. *Nucleic Acids Res* 47:4255–4271. doi:10.1093/nar/gkz130.
- 936 67. Shine MB, Zhang K, Liu H, Lim G-H, Xia F, Yu K, Hunt AG, Kachroo A, Kachroo P. 2022. Phased  
937 small RNA-mediated systemic signaling in plants. *Sci. Adv.* 8:eabm8791.  
938 doi:10.1126/sciadv.abm8791.
- 939 68. Li L, Collier B, Spanu P. 2019. Isolation of powdery mildew haustoria from infected barley. *Bio*  
940 *Protoc* 9. doi:10.21769/BioProtoc.3299.
- 941 69. Rutter BD, Innes RW. 2017. Extracellular vesicles isolated from the leaf apoplast carry stress-  
942 response proteins. *Plant Physiol* 173:728–741. doi:10.1104/pp.16.01253.
- 943 70. Barberán-Soler S, Vo JM, Hogans RE, Dallas A, Johnston BH, Kazakov SA. 2018. Decreasing  
944 miRNA sequencing bias using a single adapter and circularization approach. *Genome Biol.*  
945 19:105. doi:10.1186/s13059-018-1488-z.
- 946 71. Martin M. 2011. Cutadapt removes adapter sequences from high-throughput sequencing reads.  
947 *EMBnet j.* 17:10. doi:10.14806/ej.17.1.200.
- 948 72. Bolger AM, Lohse M, Usadel B. 2014. Trimmomatic: A flexible trimmer for Illumina sequence  
949 data. *Bioinformatics* 30:2114–2120. doi:10.1093/bioinformatics/btu170.
- 950 73. Shen W, Le S, Li Y, Hu F. 2016. SeqKit: A cross-platform and ultrafast toolkit for FASTA/Q file  
951 manipulation. *PLoS One* 11:e0163962. doi:10.1371/journal.pone.0163962.
- 952 74. Li H, Handsaker B, Wysoker A, Fennell T, Ruan J, Homer N, Marth G, Abecasis G, Durbin R. 2009.  
953 The Sequence Alignment/Map format and SAMtools. *Bioinformatics* 25:2078–2079.  
954 doi:10.1093/bioinformatics/btp352.
- 955 75. Quinlan AR, Hall IM. 2010. BEDTools: A flexible suite of utilities for comparing genomic features.  
956 *Bioinformatics* 26:841–842. doi:10.1093/bioinformatics/btq033.
- 957 76. Liao Y, Smyth GK, Shi W. 2014. featureCounts: An efficient general purpose program for  
958 assigning sequence reads to genomic features. *Bioinformatics* 30:923–930.  
959 doi:10.1093/bioinformatics/btt656.
- 960 77. Wickham H. 2009. ggplot2. Elegant graphics for data analysis. Use R. Springer, New York.  
961 <https://ebookcentral.proquest.com/lib/kxp/detail.action?docID=511468>.
- 962 78. R Core Team. 2021. R: A language and environment for statistical computing. [http://www.R-](http://www.R-project.org/)  
963 [project.org/](http://www.R-project.org/).
- 964 79. Kerpedjiev P, Hammer S, Hofacker IL. 2015. Forna (force-directed RNA): Simple and effective  
965 online RNA secondary structure diagrams. *Bioinformatics* 31:3377–3379.  
966 doi:10.1093/bioinformatics/btv372.

- 967 80. Langfelder P, Horvath S. 2008. WGCNA: An R package for weighted correlation network  
968 analysis. *BMC Bioinformatics* 9:559. doi:10.1186/1471-2105-9-559.
- 969 81. Love MI, Huber W, Anders S. 2014. Moderated estimation of fold change and dispersion for  
970 RNA-seq data with DESeq2. *Genome Biol.* 15:550. doi:10.1186/s13059-014-0550-8.
- 971 82. Robinson MD, McCarthy DJ, Smyth GK. 2010. edgeR: A Bioconductor package for differential  
972 expression analysis of digital gene expression data. *Bioinformatics* 26:139–140.  
973 doi:10.1093/bioinformatics/btp616.
- 974 83. Law CW, Chen Y, Shi W, Smyth GK. 2014. voom: Precision weights unlock linear model analysis  
975 tools for RNA-seq read counts. *Genome Biol.* 15:R29. doi:10.1186/gb-2014-15-2-r29.
- 976 84. Lex A, Gehlenborg N, Strobel H, Vuillemot R, Pfister H. 2014. UpSet: Visualization of  
977 intersecting sets. *IEEE Trans Vis Comput Graph* 20:1983–1992.  
978 doi:10.1109/TVCG.2014.2346248.
- 979 85. Ge SX, Jung D, Yao R. 2020. ShinyGO: a graphical gene-set enrichment tool for animals and  
980 plants. *Bioinformatics* 36:2628–2629. doi:10.1093/bioinformatics/btz931.
- 981 86. Supek F, Bošnjak M, Škunca N, Šmuc T. 2011. REVIGO summarizes and visualizes long lists of  
982 gene ontology terms. *PLoS One* 6:e21800. doi:10.1371/journal.pone.0021800.
- 983 87. Robinson JT, Thorvaldsdóttir H, Wenger AM, Zehir A, Mesirov JP. 2017. Variant review with the  
984 Integrative Genomics Viewer. *Cancer Res* 77:e31–e34. doi:10.1158/0008-5472.CAN-17-0337.
- 985 88. Steinegger M, Söding J. 2017. MMseqs2 enables sensitive protein sequence searching for the  
986 analysis of massive data sets. *Nat Biotechnol* 35:1026–1028. doi:10.1038/nbt.3988.
- 987 89. Deng P, Le Wang, Cui L, Feng K, Liu F, Du X, Tong W, Nie X, Ji W, Weining S. 2015. Global  
988 identification of microRNAs and their targets in barley under salinity stress. *PLoS One*  
989 10:e0137990. doi:10.1371/journal.pone.0137990.
- 990 90. Wu L, Yu J, Shen Q, Huang L, Wu D, Zhang G. 2018. Identification of microRNAs in response to  
991 aluminum stress in the roots of Tibetan wild barley and cultivated barley. *BMC Genomics*  
992 19:560. doi:10.1186/s12864-018-4953-x.
- 993 91. Xin M, Wang Y, Yao Y, Song N, Hu Z, Qin D, Xie C, Peng H, Ni Z, Sun Q. 2011. Identification and  
994 characterization of wheat long non-protein coding RNAs responsive to powdery mildew  
995 infection and heat stress by using microarray analysis and SBS sequencing. *BMC Plant Biol*  
996 11:61. doi:10.1186/1471-2229-11-61.
- 997 92. Ragupathy R, Ravichandran S, Mahdi MSR, Huang D, Reimer E, Domaratzki M, Cloutier S. 2016.  
998 Deep sequencing of wheat sRNA transcriptome reveals distinct temporal expression pattern of  
999 miRNAs in response to heat, light and UV. *Sci Rep* 6:39373. doi:10.1038/srep39373.
- 1000 93. Derbyshire M, Mbengue M, Barascud M, Navaud O, Raffaele S. 2019. Small RNAs from the plant  
1001 pathogenic fungus *Sclerotinia sclerotiorum* highlight host candidate genes associated with  
1002 quantitative disease resistance. *Mol Plant Pathol* 20:1279–1297. doi:10.1111/mpp.12841.
- 1003 94. Zhu C, Liu J-H, Zhao J-H, Liu T, Chen Y-Y, Wang C-H, Zhang Z-H, Guo H-S, Duan C-G. 2022. A  
1004 fungal effector suppresses the nuclear export of AGO1-miRNA complex to promote infection in  
1005 plants. *Proc Natl Acad Sci USA* 119:e2114583119. doi:10.1073/pnas.2114583119.
- 1006 95. Dunker F, Trutzenberg A, Rothenpieler JS, Kuhn S, Pröls R, Schreiber T, Tissier A, Kemen A,  
1007 Kemen E, Hückelhoven R, Weiberg A. 2020. Oomycete small RNAs bind to the plant RNA-  
1008 induced silencing complex for virulence. *eLife* 9:e56096. doi:10.7554/eLife.56096.
- 1009



## 1010 Figure legends

1011

1012 **Figure 1. Isolation of total RNA from six distinct sample types. (A)** We isolated total RNA  
1013 from the following biological materials of *B. hordei*-infected barley leaves at four days after  
1014 inoculation: (1) Epiphytic fungal mycelium (MYC), (2) infected epidermis without mycelium  
1015 (EPI), (3) fungal haustoria (HAU), (4) microsomes of the epidermis depleted of haustoria  
1016 (P40). In addition, we isolated total RNA from (5) apoplastic extracellular vesicles of infected  
1017 plants (EV+) at three days after inoculation, and (6) apoplastic extracellular vesicles from  
1018 non-infected control plants (EV-). The figure was created using bioRender.com. **(B)**  
1019 Bioinformatic pipeline for sRNA-seq data analysis. We analysed the sRNA-seq reads in three  
1020 ways: (1) by read size and read mapping distribution to the respective genomes, followed by  
1021 read BLAST against the RFAM database for particular fractions of the read data; (2) by  
1022 ShortStack analysis to detect putative miRNAs in both organisms, followed by principal  
1023 component analysis for sample clustering, miRNA expression analysis, miRNA target  
1024 prediction, and functional description of these targets by GO assignment; (3) by detection of  
1025 loci enriched with predicted phasiRNAs.

1026

1027 **Figure 2. Specific barley 5.8S rRNA- and *B. hordei* tRNA-derived sRNAs are enriched in the**  
1028 **31-33 base reads.** We aligned sRNA-seq reads of 31-33 bases in length to the RFAM  
1029 database using MMSeqs2 (88). **(A)** The stacked bar graph shows the percentage of reads  
1030 identified as 5S, 5.8S, 18S (small subunit, SSU), 28S (large subunit, LSU), or tRNA, as  
1031 indicated in the color-coded legend. Green, reads identified as derived from *H. vulgare*;  
1032 blue, reads identified as derived from *B. hordei* DH14; grey, reads not assigned to either  
1033 *H. vulgare* or *B. hordei*; purple, reads identified as *B. hordei* tRNA-derived. Epiphytic fungal  
1034 mycelium (MYC), infected epidermis without mycelium (EPI), fungal haustoria (HAU),  
1035 microsomes of the epidermis without haustoria (P40), apoplastic extracellular vesicles (EV+),  
1036 and apoplastic extracellular vesicles of non-infected control plants (EV-). The total number  
1037 of reads assigned to each sample is given below the bar graph (visualized by circle size). **(B)**  
1038 Predicted secondary structure of the barley 5.8S rRNA (RFAM accession  
1039 CAJW010993076.1:c203-48; RNA central accession URS0000C3A4AE\_112509), calculated by  
1040 R2DT in RNA central (<https://rnacentral.org>) and visualized with Forna (79). The RNA  
1041 sequence in orange indicates the over-represented 3' end in the reads from the EPI and EV+  
1042 samples. **(C)** Histogram showing the number of reads (Read counts, x-axis) accounting for  
1043 the *B. hordei* tRNA-derived reads in the sample MYC. The coding amino acid and respective  
1044 mRNA codons are indicated on the left. The orange portion of the histogram bars indicates  
1045 the fraction of reads coming from the three most abundant tRNA fragments. **(D)** The three  
1046 most abundant tRNAs represented in the MYC sample are shown; left, Gln tRNA with UUG  
1047 anticodon; middle, Gln tRNA with CUG anticodon; right, Glu tRNA with UUC anticodon. The  
1048 orange-labelled sequences indicate the abundant tRNA fragments.

1049

1050 **Figure 3. The miRNA content of microsomal samples differs from mycelial, epidermal, and**  
1051 **haustorial samples. (A) and (B).** We used non-metric multi-dimensional scaling (NMDS),  
1052 which collapses multidimensional information into two dimensions to visualize sample  
1053 similarity. Each data point represents the collapsed miRNA expression data from *H. vulgare*

1054 (A) and *B. hordei* (B). Blue, epiphytic fungal mycelium (MYC); green, infected epidermis  
1055 without mycelium (EPI); light blue, fungal haustoria (HAU); purple, microsomes of the  
1056 epidermis without haustoria (P40); orange, apoplastic extracellular vesicles (EV+); grey,  
1057 apoplastic extracellular vesicles of non-infected control plants (EV-). (C) and (D) miRNA  
1058 sample distances based on a Pearson correlation matrix from the miRNA expression data.  
1059 The pair-wise Pearson correlations were used to calculate a Euclidean distance tree with all  
1060 samples for *H. vulgare* (C) and *B. hordei* (D).

1061

1062 **Figure 4. Large sets of miRNAs exhibit site-specific distribution.** We calculated site-specific  
1063 abundance in MYC, EPI, HAU, P40, and EV+ samples for (A) *H. vulgare* and (B) *B. hordei* using  
1064 WGCNA and assigned miRNAs to samples exhibiting >2.5-fold enrichment over the average.  
1065 The bottom panels indicate the set sizes of miRNAs in the respective samples (bar graph,  
1066 left); blue, epiphytic fungal mycelium (MYC); green, infected epidermis without mycelium  
1067 (EPI); light blue, fungal haustoria (HAU); purple, microsomes of the epidermis without  
1068 haustoria (P40); orange, apoplastic extracellular vesicles (EV+). The dots indicate the  
1069 samples contributing to the respective interaction sets. The second panels from the bottom  
1070 are bar graphs of the intersection numbers, which are the numbers of miRNAs in the  
1071 exclusive intersections. The third panels from the bottom show the normalized abundance  
1072 of the miRNAs in the respective interaction sets as violin plot; the maximum TPM value  
1073 across samples was used for each data point. The top panels are stacked bar charts of the  
1074 sum of predicted miRNA target genes in *B. hordei* (blue) and *H. vulgare* (green); *B. hordei*  
1075 genes encoding a secreted protein are shown in orange.

1076

1077 **Figure 5. GO enrichment analysis of putative cross-kingdom miRNA targets.** We  
1078 determined all putative targets of the sets of *B. hordei* and *H. vulgare* miRNAs via  
1079 psRNAtarget (31). We used ShinyGO v0.75 (85) to calculate enriched gene ontology (GO)  
1080 terms in all miRNA target sets and summarized redundant GO terms with EMBL-EBI  
1081 QuickGO (<https://www.ebi.ac.uk/QuickGO/>) on GO version 2022-04-26 and REVIGO (86). (A)  
1082 GO enrichment terms found in putative cross-kingdom targets of *B. hordei* miRNAs in  
1083 *H. vulgare*. (B) GO enrichment terms found in putative cross-kingdom targets of *H. vulgare*  
1084 miRNAs in *B. hordei*. The GO terms and identifiers are indicated next to the bubble plots.  
1085 Bubble size indicates fold enrichment of the term in the respective subset, fill color indicates  
1086 -Log<sub>10</sub> of the FDR-adjusted enrichment *P* value. The miRNA subsets are indicated below the  
1087 bubble plots (see Figure 4 for all subsets). The icons on top of the plot were created with  
1088 bioRender.com; the blue mycelium indicates *B. hordei* and the green plant barley.

1089

1090 **Figure 6. Transposable elements and genes encoding Sgk2 kinases are subject to phasing**  
1091 **in *B. hordei*.** We identified phasiRNA-rich loci indicative of phasing in the genome of  
1092 *B. hordei* with ShortStack pipeline v3.8.5-1 (29), the PHASIS pipeline (33), and unitas v1.7.0  
1093 (34). (A) Global distribution of predicted phasing loci in the genome of *B. hordei* DH14 (28).  
1094 The x-axis shows the genome position in mega base pairs (Mbp) and the scaffolds are  
1095 indicated on the y-axis. Triangles denote loci in which phasiRNAs were found with unitas.  
1096 Blue triangles, phasing loci coinciding with annotated coding genes; orange triangles,  
1097 phasing loci coinciding with transposable elements; grey triangles, intergenic phasing loci.  
1098 (B) Example of one phased locus in *B. hordei*, containing the gene *BLGH\_03674*, the partial  
1099 open reading frame of a gene encoding a Sgk2 kinase. A subset of representative samples  
1100 from sites where phasing in this locus was detected is shown (EPI, MYC, and EV+), the full

1101 set of samples is displayed in Supplementary Figure 12. From top to bottom, the position on  
 1102 the scaffold, scaffold name and window, gene and transposable element annotations, and  
 1103 sample names are indicated. Red lines indicate reads mapping in sense orientation of the  
 1104 displayed sequence window; blue lines show reads mapping in antisense orientation. A  
 1105 zoom-in is shown on the right. The putative trans-activating RNA (tasiRNA) is indicated with  
 1106 an asterisk. The figure was generated after inspection with Integrative Genome Viewer (IGV;  
 1107 (87)). (C) Bar graph summarizing the number of phasing loci types. The x-axis indicates the  
 1108 locus type, i.e., coding gene, transposon, or intergenic; the y-axis shows the number of loci.  
 1109 (D) GO enrichment of phased coding genes was calculated with ShinyGO v0.75 (85); terms  
 1110 were summarized to non-redundant GO terms with EMBL-EBI QuickGO  
 1111 (<https://www.ebi.ac.uk/QuickGO/>) on GO version 2022-04-26 and REVIGO (86). The bubble  
 1112 size indicates fold enrichment of the term in the respective subset, fill color indicates -Log10  
 1113 of the FDR-adjusted enrichment *P* value. (E) A Venn diagram summarizing the overlap of  
 1114 discovered phasing loci with the three methods.

1115  
 1116  
 1117

## 1118 Tables

1119  
 1120

**Table 1.** Barley and *B. hordei* sRNAs (rRFs) derived from the 3'-end of the respective 5.8S rRNA.

| Sample | Peak [bases] | Number of reads | <i>H. vulgare</i> |                                    |      | <i>B. hordei</i> |                                    |      |
|--------|--------------|-----------------|-------------------|------------------------------------|------|------------------|------------------------------------|------|
|        |              |                 | 5.8S rRNA         | 3'-fragment<br><i>Hvu</i> -rRF0001 | [%]  | 5.8S rRNA        | 3'-fragment<br><i>Bho</i> -rRF0001 | [%]  |
| MYC    | 31-32        | 5,667,110       | 4,984             | 4,719                              | 94.7 | 1,210,651        | 1,205,821                          | 99.6 |
| EPI    | 32-33        | 37,604,028      | 30,810,544        | 30,592,716                         | 99.3 | 888,803          | 831,512                            | 93.4 |
| HAU    | 31-32        | 8,489,360       | 809,111           | 763,391                            | 94.3 | 2,218,412        | 1,740,772                          | 78.5 |
| P40    | 31-32        | 11,704,109      | 1,765,971         | 1,573,893                          | 89.1 | 135,087          | 56,148                             | 41.6 |
| EV+    | 31-32        | 28,470,676      | 22,961,242        | 22,634,275                         | 98.6 | 602,961          | 576,768                            | 95.7 |
| EV-    | 31-32        | 3,330,270       | 979,231           | 965,541                            | 98.6 | 450,299          | 448,041                            | 99.5 |

1121  
 1122  
 1123

**Table 2.** Characteristic *H. vulgare* and *B. hordei* RNA fragments derived from tRNA (tRF) and rRNA (rRF).

| Fragment            | Sequence (5'-3')                 | Species           | RNA       | Sample        |
|---------------------|----------------------------------|-------------------|-----------|---------------|
| <i>Hvu</i> -rRF0001 | CGGCCGAGGGGCACGCCUGCCUGGGCGUCA   | <i>H. vulgare</i> | 5.8S rRNA | EPI, EV+, EV- |
| <i>Hvu</i> -rRF0002 | CCGGAGGUAGGGUCCAGUGGCCGGAAGAGCA  | <i>H. vulgare</i> | 28S rRNA  | HAU, P40      |
| <i>Hvu</i> -rRF0003 | CGCGACGGGGCAUUGUAAGUGGCAGAGUGGCC | <i>H. vulgare</i> | 28S rRNA  | EPI, EV+, EV- |
| <i>Hvu</i> -rRF0004 | CAGGUCUCCAAGGUGAACAGCCUCUGGCCAA  | <i>H. vulgare</i> | 28S rRNA  | EV+           |
| <i>Hvu</i> -rRF0005 | GCUCGGGGGUCCCGGCCCGAACCCGUCGGC   | <i>H. vulgare</i> | 28S rRNA  | EV-           |
| <i>Bho</i> -rRF0001 | UCCCCAGGGGCAUGCCUGUUCGAGCGUCC    | <i>B. hordei</i>  | 5.8S rRNA | HAU           |
| <i>Bho</i> -rRF0002 | UCUUUGAACGCACAUUGC GCCCCUGGGA    | <i>B. hordei</i>  | 5.8S rRNA | HAU           |
| <i>Bho</i> -rRF0003 | GUUACGGGCCCCGAGUUGUAAUUGUAGAAGAU | <i>B. hordei</i>  | 28S rRNA  | MYC, EPI, HAU |
| <i>Bho</i> -rRF0004 | AAGCGUGUUAACCAUACUUCACCGCCCGGGUA | <i>B. hordei</i>  | 28S rRNA  | HAU, P40      |
| <i>Bho</i> -tRF0001 | GGUUGAUUAGUGUAGUUGGUUAUCACAUCGGA | <i>B. hordei</i>  | tRNA      | MYC           |
| <i>Bho</i> -tRF0002 | GGCCAGUUGGUGUAAUGGUCAGCACGUCGGA  | <i>B. hordei</i>  | tRNA      | MYC           |
| <i>Bho</i> -tRF0003 | CGGAGAGCCCCGGGUUCGAUUCGCCGAUGC   | <i>B. hordei</i>  | tRNA      | MYC           |

1124  
 1125  
 1126  
 1127

## 1128 Supplementary Figure legends

1129

### 1130 **Supplementary Figure 1. Each sample type exhibits a distinctive sRNA read size**

1131 **distribution.** (A) We determined the sRNA read counts for read lengths between 15 and 40  
1132 bases and plotted the read length (x-axis) against the respective number of reads (y-axis).  
1133 Three replicates were analyzed for each of our six sample types: Epiphytic fungal mycelium  
1134 (MYC), infected epidermis without mycelium (EPI), fungal haustoria (HAU), microsomes of  
1135 the epidermis without haustoria (P40), apoplastic extracellular vesicles (EV+), and apoplastic  
1136 extracellular vesicles of non-infected control plants (EV-). (B) We mapped sRNA sequencing  
1137 reads of 15 and 40 bases long to the reference genomes of *H. vulgare* IBSCv2 (27) and *B.*  
1138 *hordei* DH14 (28). The stacked bar graph shows the read counts (y-axis) for the respective  
1139 read size (x-axis) from the three replicates. Green, reads mapping to the *H. vulgare* genome;  
1140 blue, reads mapping to the *B. hordei* DH14 genome; grey, reads that did not map to either  
1141 of the two genomes.

1142

### 1143 **Supplementary Figure 2. The majority of reads mapping to *B. hordei* or *H. vulgare***

1144 **originate from transposable elements or coding genes.** We assigned reads aligning to the  
1145 genomes of (A) *B. hordei* or (B) *H. vulgare* to the features mRNA (coding genes; light  
1146 blue/green), miRNA loci identified in this study (blue/green), and transposable elements  
1147 (dark blue/green). We plotted the read length (x-axis) against the respective number of  
1148 reads (y-axis). The six sample types were epiphytic fungal mycelium (MYC), infected  
1149 epidermis without mycelium (EPI), fungal haustoria (HAU), microsomes of the epidermis  
1150 without haustoria (P40), apoplastic extracellular vesicles (EV+), and apoplastic extracellular  
1151 vesicles of non-infected control plants (EV-).

1152

### 1153 **Supplementary Figure 3. A broad range of reads originates from rRNAs in haustoria and**

1154 **microsomal fractions.** (A) We aligned all reads to the 5.8S (red), 18S (blue), and 28S (green)  
1155 rDNA sequences of *B. hordei* and *H. vulgare*. The stacked bar graph shows the read counts  
1156 (y-axis) for the respective read size (x-axis) from the three replicates. Three replicates were  
1157 analyzed for each of our six sample types: Epiphytic fungal mycelium (MYC), infected  
1158 epidermis without mycelium (EPI), fungal haustoria (HAU), microsomes of the epidermis  
1159 without haustoria (P40), apoplastic extracellular vesicles (EV+), and apoplastic extracellular  
1160 vesicles of non-infected control plants (EV-). Colors indicate reads aligning to the different  
1161 rDNAs: Light blue, *B. hordei* 18S rDNA (RNAcentral accession URS000021D3E6\_2867405);  
1162 dark blue, *H. vulgare* 18S rDNA (URS0000AF30DE\_112509); light green, *B. hordei* 28S rDNA  
1163 (URS0002174482\_62688); dark green, *H. vulgare* 28S rDNA (URS000212856A\_112509); light  
1164 red, *B. hordei* 5.8S rDNA (URS00006663F0\_546991); dark red, *H. vulgare* 5.8S rDNA  
1165 (URS0000C3A4AE\_112509); grey, reads that did not align with any rDNA sequence. (B)  
1166 Alignment of sRNA sequencing reads of 27-32 bases in length from HAU to the *B. hordei* 5.8S  
1167 rDNA (154 bases in length). The graph shows the cumulative number of reads from the  
1168 three replicates (y-axis) mapping to each position of the *B. hordei* 5.8S rDNA (x-axis). (C)  
1169 Secondary structure of the *B. hordei* 5.8S rRNA (RFAM accession CAUH01009408.1:1222-  
1170 1375; RNA central accession URS00006663F0\_546991) predicted by R2DT in RNA central

1171 (<https://rnacentral.org>) and visualized with Forna (79). The RNA sequences in orange  
1172 indicates the over-represented 3' end in the reads from the HAU sample.

1173

1174 **Supplementary Figure 4. Specific barley 28S rRNA-derived sRNAs are enriched in the 31-33**

1175 **base long reads. (A)** We aligned sRNA sequencing reads of 31-33 bases in length to the

1176 *H. vulgare* 28S rDNA (3,853 bases in length). The graphs display the number of reads  
1177 identified (y-axis) mapping to each position of the barley 28S rDNA (x-axis). Epiphytic fungal  
1178 mycelium (MYC), infected epidermis without mycelium (EPI), fungal haustoria (HAU),

1179 microsomes of the epidermis without haustoria (P40), apoplatic extracellular vesicles (EV+),

1180 and apoplatic extracellular vesicles of non-infected control plants (EV-). (B) Secondary

1181 structure of the 28S rRNA of *H. vulgare* (RFAM accession CAJW010993076.1:203-48; RNA

1182 central accession URS000212856A\_112509) predicted by R2DT in RNA central

1183 (<https://rnacentral.org>). The sequence stretches shown in orange indicate the over-

1184 represented 28S rRNA fragments *Hvu*-rRF0002 and *Hvu*-rRF0003 from the HAU and P40

1185 samples. *Hvu*-rRF0003 fragments were also detected in EV+ and EV- samples, in addition to

1186 *Hvu*-rRF0004 and *Hvu*-rRF0005. (C) Sequences of the enriched 28S rRNA fragments of *H.*

1187 *vulgare* in FASTA format.

1188

1189 **Supplementary Figure 5. Specific *B. hordei* 28S rRNA-derived sRNAs are enriched in the 31-**

1190 **33 bases long reads. (A)** We aligned sRNA sequencing reads of 31-33 bases to the *B. hordei*

1191 28S rDNA (3,564 bases). The graphs display the number of reads identified (y-axis) mapping

1192 to each position of the *B. hordei* 28S rDNA (x-axis). Epiphytic fungal mycelium (MYC),

1193 infected epidermis without mycelium (EPI), fungal haustoria (HAU), microsomes of the

1194 epidermis without haustoria (P40), apoplatic extracellular vesicles (EV+), and apoplatic

1195 extracellular vesicles of non-infected control plants (EV-). (B) Secondary structure of the 28S

1196 rRNA of *B. hordei* (RFAM accessions CAUH01009223.1:1667-1 and CAUH01013050.1:1126-1;

1197 RNA central accession URS0000C6B9A3\_546991; full structure was reconstructed from

1198 these partial fragments) predicted by R2DT in RNA central (<https://rnacentral.org>). The RNA

1199 stretches shown in orange indicate the over-represented 28S rRNA fragments *Bho*-rRF0003

1200 and *Bho*-rRF0004 from the Myc, Epi, Hau, and P40 samples. The fragment *Hvu*-rRF0004 is

1201 indicated in the EV+ plot. (C) DNA sequences of the enriched 28S rRNA of *B. hordei*

1202 fragments in FASTA format. (D) Pairwise alignment between *Hvu*-rRF0004 and the

1203 respective orthologous *B. hordei* 28S rDNA sequence. Positions in dark blue indicate

1204 identity, positions in light blue mismatches between the two sequences. Numbers above the

1205 alignment indicate alignment position, numbers on the left the position in the respective

1206 rDNA sequence of *H. vulgare* and *B. hordei*. The sequence covered by *Hvu*-rRF0004 is

1207 indicated below the alignment.

1208

1209 **Supplementary Figure 6. Predicted secondary structures of rRNA and tRNA fragments and**

1210 **their minimum free energies.** We used the Vienna RNAfold v2.4.18 webserver (30) to

1211 calculate secondary structures and their minimum free energy (MFE) of *H. vulgare* and

1212 *B. hordei* 5.8S rRNA (A), 28S rRNA (B), and tRNA (C) fragments. (D) The cartoon of the 5.8S

1213 rRNA structure indicates the position of the respective fragments; orange fragments

1214 indicate rRNA and tRNA fragments detected in our sRNA-seq dataset (Table 2) and blue

1215 fragments indicate theoretical fragments of identical or similar length used for comparison.  
1216 The minimum free energies are indicated for each fragment.

1217

1218 **Supplementary Figure 7. Read length distribution profiles vary between sRNA-seq**  
1219 **datasets.** We downloaded publicly available sRNA-seq datasets from the NCBI SRA database  
1220 at <https://www.ncbi.nlm.nih.gov/sra> (accessions summarized in Supplementary Table 8) and  
1221 analyzed the read length profiles of reads between 15 and 40 bases in length. The x-axis  
1222 shows number of reads and the y-axis the read length in bases. We examined datasets from  
1223 the following samples: (A) *H. vulgare* infected with *B. hordei* at 0, 24, and 48 hpi (24); (B)  
1224 *H. vulgare* under salt stress (89) and aluminium stress (90), respectively; (C) *Triticum*  
1225 *aestivum* (wheat) after infection with *B. graminis* f.sp. *tritici* at 12 hpi and under 40 °C heat  
1226 stress (91); (D) *T. aestivum* infected with *Zymoseptoria tritici* at 12 dpi (1); (E) *T. aestivum*  
1227 under 37 °C heat stress, continuous light stress, or UV treatment stress (92); (F) *Glycine max*  
1228 (soybean) during nodulation with the bacterial species *Bradyrhizobium japonicum* at 10 and  
1229 20 days after inoculation (50); (G) *Arabidopsis thaliana* and *Phaseolus vulgaris* (common  
1230 bean) during infection with *Sclerotinia sclerotiorum* (93); (H) *A. thaliana* after infection with  
1231 *Verticillium dahliae* and the *V. dahliae* mutant *aly1 aly2* (94); (I) *A. thaliana* infected with  
1232 *Hyaloperonospora arabidopsidis* at 3, 4, and 7 dpi (95); (J) *Botrytis cinerea* cultivated *in vitro*  
1233 (11); (K) *A. thaliana* infected with *B. cinerea* at 24, 48, and 72 hpi (11).

1234

1235 **Supplementary Figure 8. Most sRNA-seq datasets do not exhibit read length-specific**  
1236 **enrichment of rRNA fragments.** We downloaded publicly available sRNA-seq datasets from  
1237 the NCBI SRA database at <https://www.ncbi.nlm.nih.gov/sra> (accessions summarized in  
1238 Supplementary Table 8) and aligned all reads against the respective 5.8S, 18S, and 28S rDNA  
1239 sequences of each species. The stacked bar graph shows the read counts (y-axis) for the  
1240 respective read size (x-axis) from all available replicates. Colors indicate reads aligning to the  
1241 different rDNAs: Light blue, plant 18S rDNA; dark blue, fungal 18S rDNA or bacterial 16S  
1242 rDNA; light green, plant 28S rDNA; dark green, fungal 28S rDNA or bacterial 23 rDNA; light  
1243 red, plant 5.8S rDNA; dark red, fungal 5.8S rDNA or bacterial 5S rDNA; grey, reads that did  
1244 not align with any rDNA sequence. We examined datasets from the following samples: (A)  
1245 *H. vulgare* infected with *B. hordei* at 0, 24, and 48 hpi (24); (B) *H. vulgare* under salt stress  
1246 (89) and aluminium stress (90), respectively; (C) *Triticum aestivum* (wheat) after infection  
1247 with *B. graminis* f.sp. *tritici* at 12 hpi and under 40 °C heat stress (91); (D) *T. aestivum*  
1248 infected with *Zymoseptoria tritici* at 12 dpi (1); (E) *T. aestivum* under 37 °C heat stress,  
1249 continuous light stress, or UV treatment stress (92); (F) *Glycine max* (soybean) during  
1250 nodulation with the bacterial species *Bradyrhizobium japonicum* at 10 and 20 days after  
1251 inoculation (50); (G) *Arabidopsis thaliana* and *Phaseolus vulgaris* (common bean) during  
1252 infection with *Sclerotinia sclerotiorum* (93); (H) *A. thaliana* after infection with *Verticillium*  
1253 *dahliae* and the *V. dahliae* mutant *aly1 aly2* (94); (I) *A. thaliana* infected with  
1254 *Hyaloperonospora arabidopsidis* at 3, 4, and 7 dpi (95); (J) *Botrytis cinerea* cultivated *in vitro*  
1255 (11); (K) *A. thaliana* infected with *B. cinerea* at 24, 48, and 72 hpi (11).

1256

1257 **Supplementary Figure 9. Clustering of sRNA-seq samples.** We used NMDS, PCC (Figure 3),  
1258 MDS (A and B), and PCA (C and D) to estimate sample differences and similarities. Each data  
1259 point represents the collapsed miRNA expression data from one sample. Blue, epiphytic  
1260 fungal mycelium (MYC); green, infected epidermis without mycelium (EPI); light blue, fungal  
1261 haustoria (HAU); purple, microsomes of the epidermis without haustoria (P40); orange,

1262 apoplasmic extracellular vesicles (EV+); grey, apoplasmic extracellular vesicles of non-infected  
1263 control plants (EV-).

1264

1265 **Supplementary Figure 10. EV- replicate three is more similar to EV samples from infected**

1266 ***H. vulgare* leaves. (A)** Read length profiles for the three apoplasmic extracellular vesicles of  
1267 non-infected control plants (EV-) generated in this study. The histograms show the read  
1268 counts (y-axis) for the respective read size (x-axis). **(B)** We aligned sRNA-seq reads of 31-32  
1269 bases in length to the RFAM database using MMSeqs2 (88). The stacked bar graph shows  
1270 the percentage of reads identified as 5S, 5.8S, 18S, 28S, or tRNA, as indicated in the color-  
1271 coded legend. Green, reads identified as derived from *H. vulgare*; blue, reads identified as  
1272 derived from *B. hordei* DH14; grey, reads originating from neither *H. vulgare* nor *B. hordei*;  
1273 purple, reads identified as *B. hordei* tRNA-derived. Apoplasmic extracellular vesicles (EV+),  
1274 apoplasmic extracellular vesicles of non-infected control plants (EV-), and the three EV-  
1275 replicates are shown. Total reads assigned to each sample are provided below the graph;  
1276 circles visually indicate the total number of reads for comparison. **(C)** We aligned sRNA-seq  
1277 reads of 31-32 bases to the *H. vulgare* 28S rDNA (3,853 bases). The graphs display the  
1278 number of reads identified (y-axis) mapping to each position of the *H. vulgare* 28S rDNA (x-  
1279 axis). Apoplasmic extracellular vesicles (EV+), apoplasmic extracellular vesicles of non-infected  
1280 control plants (EV-), and the three replicates for EV-. *Hvu*-rRF0003 fragments were detected  
1281 in EV+ and EV- samples, in addition to *Hvu*-rRF0004 (EV+) and *Hvu*-rRF0005 (EV-).  
1282 *Hvu*-rRF0003 and *Hvu*-rRF0005 were otherwise detected only in replicate 3.

1283

1284 **Supplementary Figure 11. GO enrichment of putative endogenous miRNA targets.** We  
1285 determined all putative targets of the sets of *B. hordei* and *H. vulgare* miRNAs via  
1286 psRNAtarget (31). We used ShinyGO v0.75 (85) to calculate enriched gene ontology (GO)  
1287 terms in all miRNA target sets and summarized redundant GO terms with EMBL-EBI  
1288 QuickGO (<https://www.ebi.ac.uk/QuickGO/>) on GO version 2022-04-26 and REVIGO (86). **(A)**  
1289 GO enrichment terms found in putative endogenous targets of *B. hordei* miRNAs. **(B)** GO  
1290 enrichment terms found in putative endogenous targets of *H. vulgare* miRNAs. The GO  
1291 terms and identifiers are indicated next to the bubble plots. Bubble size indicates fold  
1292 enrichment of the term in the respective subset, fill color indicates -Log<sub>10</sub> of the FDR-  
1293 adjusted enrichment *P* value. The miRNA subsets are indicated below the bubble plots (see  
1294 Figure 4 for all subsets). The icons on top of the plot were created with bioRender.com; the  
1295 blue mycelium indicates *B. hordei* and the green plant barley.

1296

1297 **Supplementary Figure 12. PhasiRNAs are abundant in the *B. hordei* locus *BLGH\_03674***  
1298 **encoding a pseudogenized *Sgk2* kinase.** PhasiRNA-rich loci indicative of phasing in the  
1299 genome of *B. hordei* were detected using ShortStack pipeline v3.8.5-1 (29), the PHASIS  
1300 pipeline (33), and unitas v1.7.0 (34). The figure shows an example of a phased locus in  
1301 *B. hordei*, containing the gene *BLGH\_03674*, which is the partial open reading frame of a  
1302 gene encoding a *Sgk2* kinase. From top to bottom, the position on the scaffold, scaffold  
1303 name and window, gene and transposable element annotations, and sample names are  
1304 indicated. Read coverage is indicated left of each mapping profile. Red lines indicate reads  
1305 mapping in sense orientation of the displayed sequence window; blue lines show reads

1306 mapping in antisense orientation. The putative trans-activating RNA (tasiRNA) is indicated  
1307 with an asterisk. The figure was generated after manual inspection with Integrative Genome  
1308 Viewer (IGV; (87)).

1309  
1310  
1311

## 1312 [Supplementary Data](#)

1313

1314 **Supplementary File 1.** FASTA file containing all tRNA and rRNA fragments identified in this  
1315 study.

1316 **Supplementary File 2.** GFF3 file with all *H. vulgare* miRNA loci identified in this study.

1317 **Supplementary File 3.** FASTA file with all *H. vulgare* miRNAs identified in this study.

1318 **Supplementary File 4.** GFF3 file with all *B. hordei* miRNA loci identified in this study.

1319 **Supplementary File 5.** FASTA file with all *B. hordei* miRNAs identified in this study.

1320

1321 **Supplementary Table 1.** General summary of sRNA sequencing samples, and sample  
1322 description.

1323 **Supplementary Table 2.** Read length distribution counts of the trimmed reads across all  
1324 samples.

1325 **Supplementary Table 3.** Distribution of read lengths mapped to the reference genome of *H.*  
1326 *vulgare* (IBSCv2; (27)).

1327 **Supplementary Table 4.** Distribution of read lengths mapped to the reference genome of *B.*  
1328 *hordei* (28).

1329 **Supplementary Table 5.** Reads from the samples were aligned by BLAST to the *H. vulgare*  
1330 28S rDNA; mappings were counted in 10-base windows.

1331 **Supplementary Table 6.** Reads from the samples were aligned by BLAST to the *B. hordei* 28S  
1332 rDNA; mappings were counted in 10-base windows.

1333 **Supplementary Table 7.** Secondary structure and minimum free energy (MFE) predictions of  
1334 *H. vulgare* and *B. hordei* tRNA and RNA fragments

1335 **Supplementary Table 8.** Accession numbers of publicly available small RNA-seq datasets  
1336 from barley, wheat, and Arabidopsis under biotic or abiotic stress.

1337 **Supplementary Table 9.** Summary of unique miRNAs detected in *B. hordei* and *H. vulgare*  
1338 by ShortStack, across all samples.

1339 **Supplementary Table 10.** Counts of sRNA-seq reads mapping to the miRNA loci in *H.*  
1340 *vulgare* identified by ShortStack.

1341 **Supplementary Table 11.** Counts of sRNA-seq reads mapping to the miRNA loci in *B. hordei*  
1342 identified by ShortStack.

1343 **Supplementary Table 12.** GO enrichment of gene sets predicted to be targeted by *H.*  
1344 *vulgare* miRNAs.

1345 **Supplementary Table 13.** GO enrichment of gene sets predicted to be targeted by *B. hordei*  
1346 miRNAs.

1347 **Supplementary Table 14.** Loci and their annotation in the genome of *B. hordei* in which  
1348 phasiRNAs were detected.



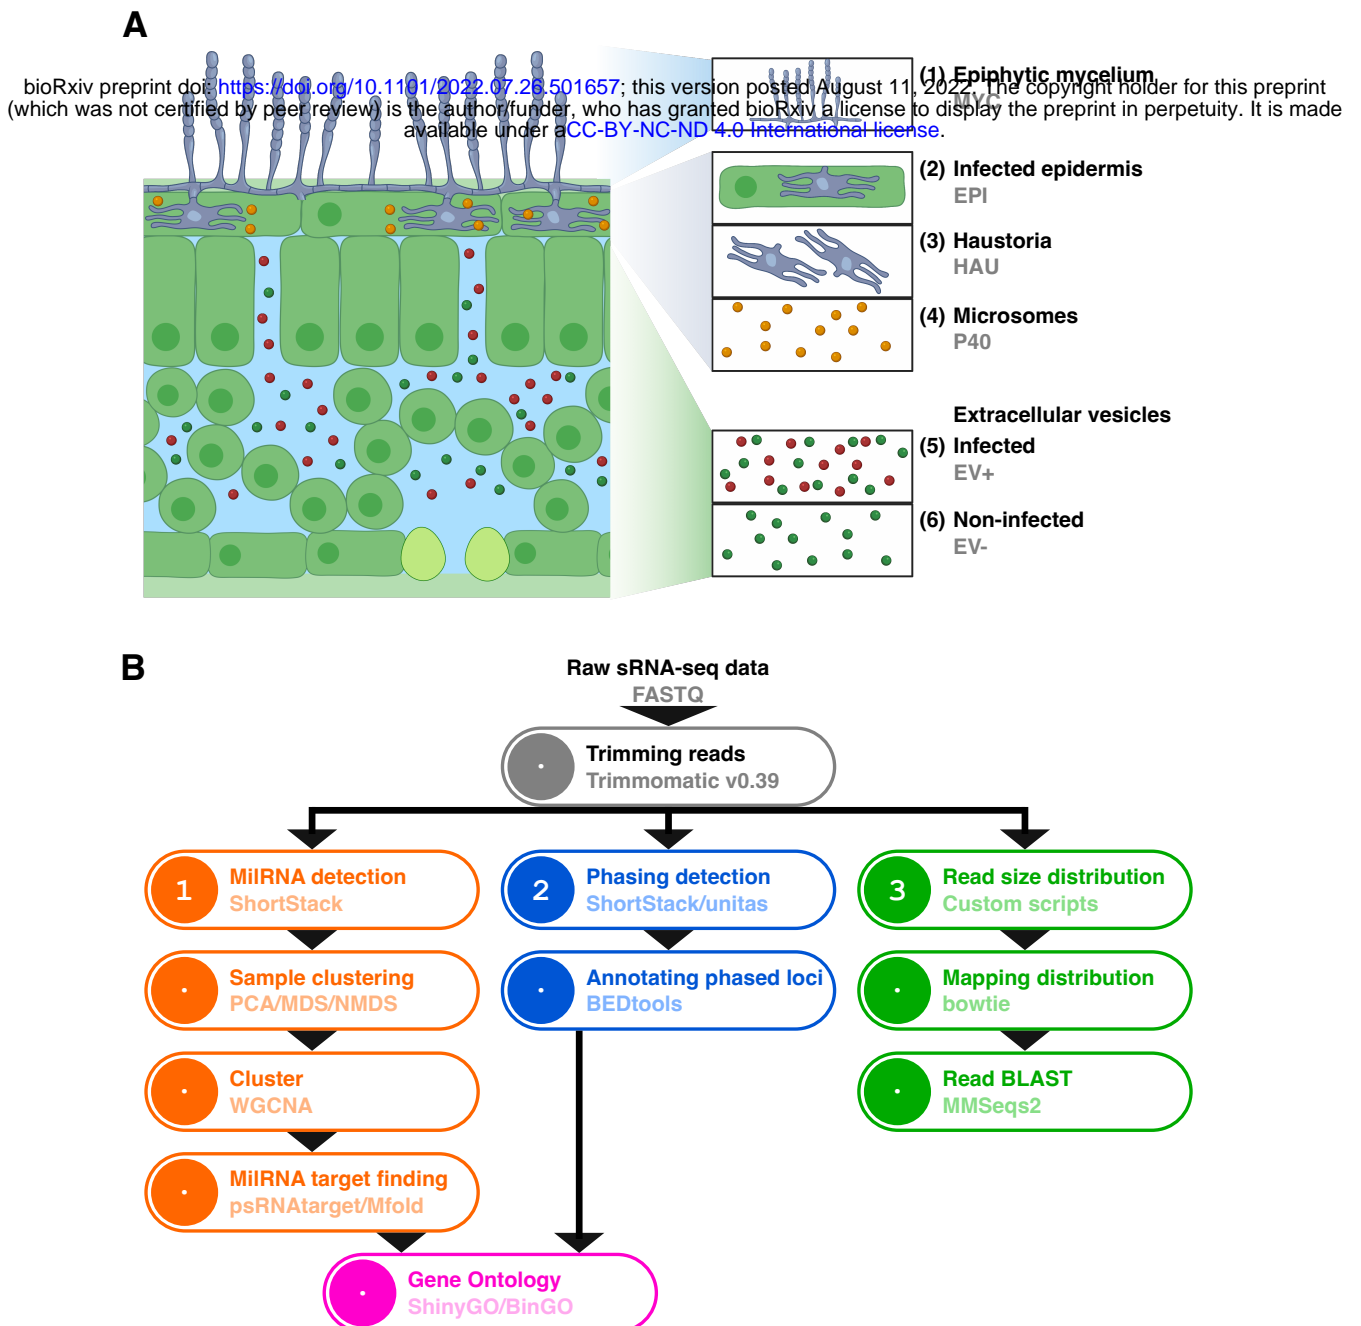

**Figure 1. Isolation of total RNAs from six distinct sample types. (A)** We isolated total RNA from the following biological materials of *B. hordei*-infected barley leaves at four days after inoculation: (1) Epiphytic fungal mycelium (MYC), (2) infected epidermis without mycelium (EPI), (3) fungal haustoria (HAU), (4) microsomes of the epidermis depleted of haustoria (P40). In addition, we isolated total RNA from (5) apoplastic extracellular vesicles of infected plants (EV+) at three days after inoculation, and (6) apoplastic extracellular vesicles from non-infected control plants (EV-). The figure was created using bioRender.com. **(B)** Bioinformatic pipeline for sRNA-seq data analysis. We analysed the sRNA-seq reads in three ways: (1) by read size and read mapping distribution to the respective genomes, followed by read BLAST against the RFAM database for particular fractions of the read data; (2) by ShortStack analysis to detect putative miRNAs in both organisms, followed by principal component analysis for sample clustering, miRNA expression analysis, miRNA target prediction, and functional description of these targets by GO assignment; (3) by detection of loci enriched with predicted phasiRNAs.

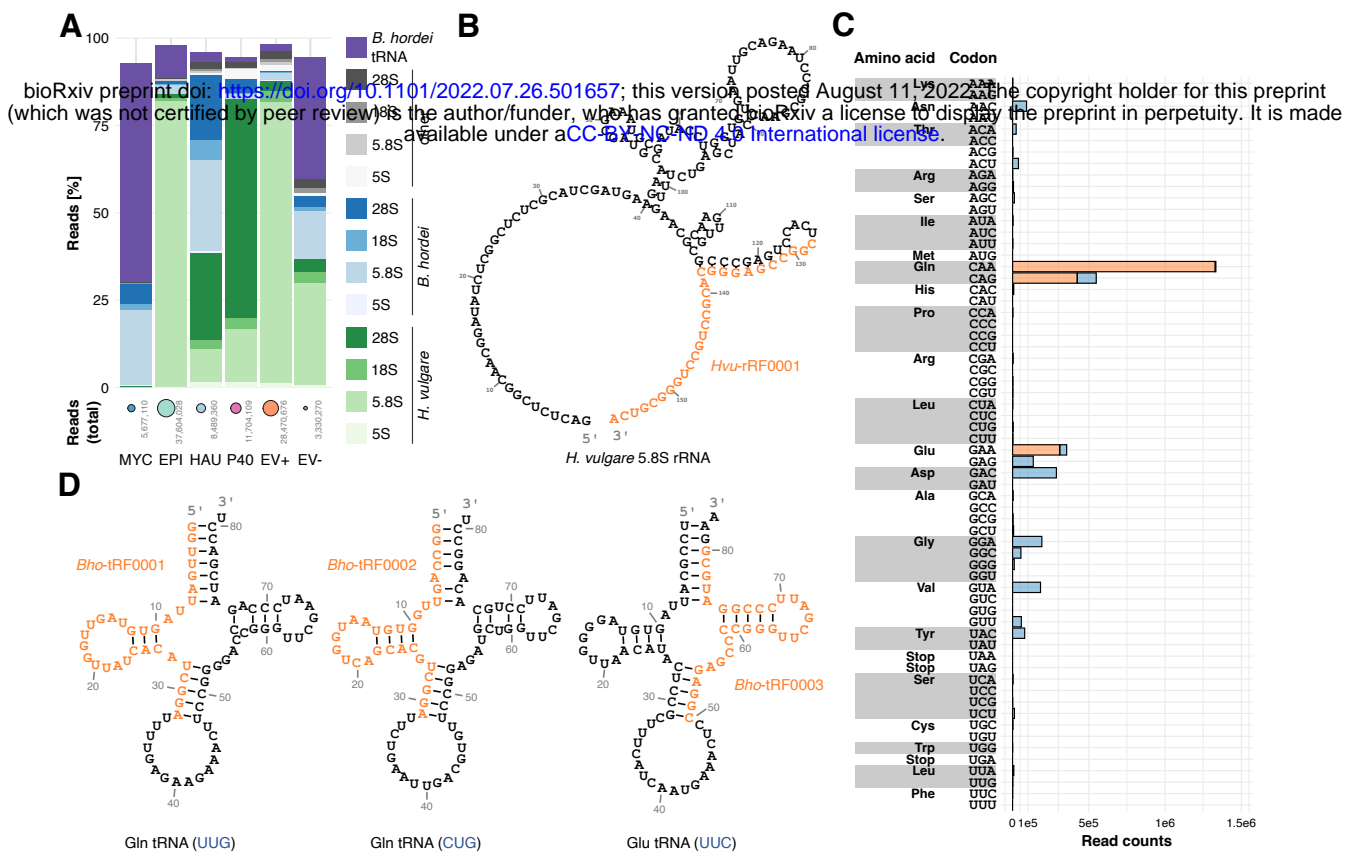

**Figure 2. Specific barley 5.8S rRNA- and *B. hordei* tRNA-derived sRNAs are enriched in the 31-33 base reads.** We aligned sRNA-seq reads of 31-33 bases in length to the RFAM database using MMSeqs2 (Steinegger and Söding 2017). **(A)** The stacked bar graph shows the percentage of reads identified as 5S, 5.8S, 18S (small subunit, SSU), 28S (large subunit, LSU), or tRNA, as indicated in the color-coded legend. Green, reads identified as derived from *H. vulgare*; blue, reads identified as derived from *B. hordei* DH14; grey, reads not assigned to either *H. vulgare* or *B. hordei*; purple, reads identified as *B. hordei* tRNA-derived. Epiphytic fungal mycelium (MYC), infected epidermis without mycelium (EPI), fungal haustoria (HAU), microsomes of the epidermis without haustoria (P40), apoplasmic extracellular vesicles (EV+), and apoplasmic extracellular vesicles of non-infected control plants (EV-). The total number of reads assigned to each sample is given below the bar graph (visualized by circle size). **(B)** Predicted secondary structure of the barley 5.8S rRNA (RFAM accession CAJW010993076.1:c203-48; RNA central accession URS0000C3A4AE\_112509), calculated by R2DT in RNA central (<https://rnacentral.org>) and visualized with Forna (Kerpedjiev *et al.* 2015). The RNA sequence in orange indicates the over-represented 3' end in the reads from the EPI and EV+ samples. **(C)** Histogram showing the number of reads (Read counts, x-axis) accounting for the *B. hordei* tRNA-derived reads in the sample MYC. The coding amino acid and respective mRNA codons are indicated on the left. The orange portion of the histogram bars indicates the fraction of reads coming from the three most abundant tRNA fragments. **(D)** The three most abundant tRNAs represented in the MYC sample are shown; left, Gln tRNA with UUG anticodon; middle, Gln tRNA with CUG anticodon; right, Glu tRNA with UUC anticodon. The orange-labelled sequences indicate the abundant tRNA fragments.

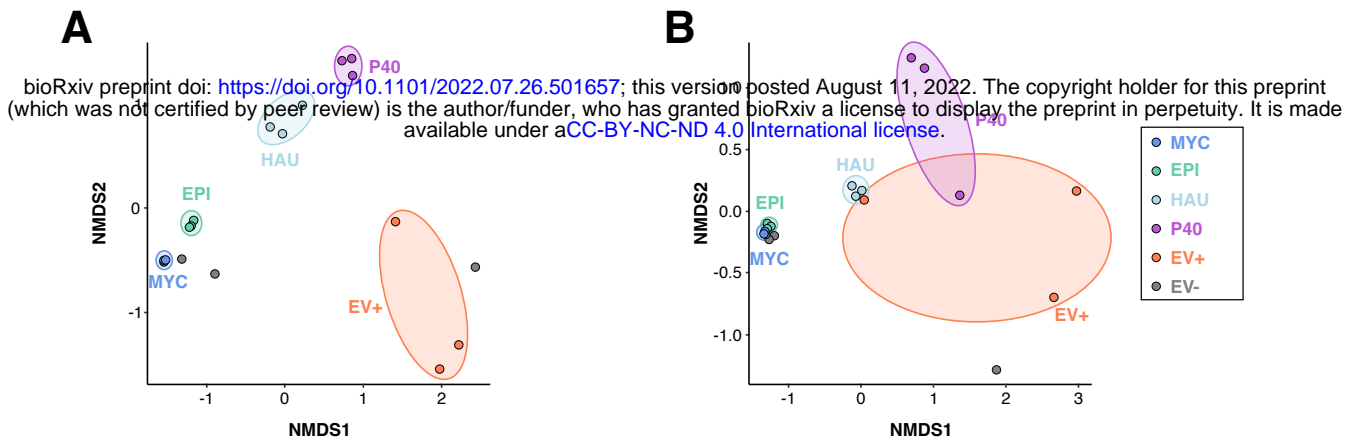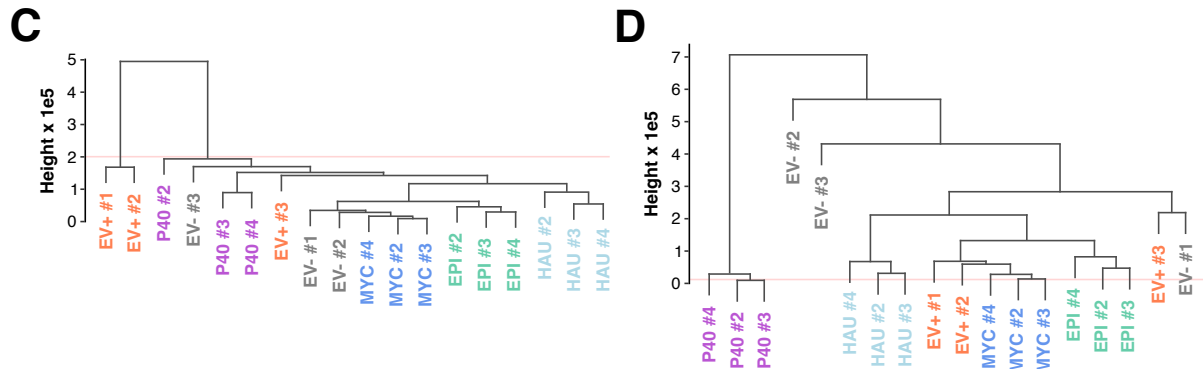

**Figure 3. The milRNA content of microsomal samples differs from mycelial, epidermal, and haustorial samples.** (A) and (B) We used non-metric multi-dimensional scaling (NMDS), which collapses multidimensional information into two dimensions to visualize sample similarity. Each data point represents the collapsed milRNA expression data from *H. vulgare* (A) and *B. hordei* (B). Blue, epiphytic fungal mycelium (MYC); green, infected epidermis without mycelium (EPI); light blue, fungal haustoria (HAU); purple, microsomes of the epidermis without haustoria (P40); orange, apoplactic extracellular vesicles (EV+); grey, apoplactic extracellular vesicles of non-infected control plants (EV-). (C) and (D) milRNA sample distances based on a Pearson correlation matrix from the milRNA expression data. The pair-wise Pearson correlations were used to calculate a Euclidean distance tree with all samples for *H. vulgare* (C) and *B. hordei* (D).

**A**

bioRxiv preprint doi: <https://doi.org/10.1101/2022.07.26.501657>; this version posted August 11, 2022. The copyright holder for this preprint (which was not certified by peer review) is the author/funder, who has granted bioRxiv a license to display the preprint in perpetuity. It is made available under a [CC-BY-NC-ND 4.0 International license](https://creativecommons.org/licenses/by-nc-nd/4.0/).

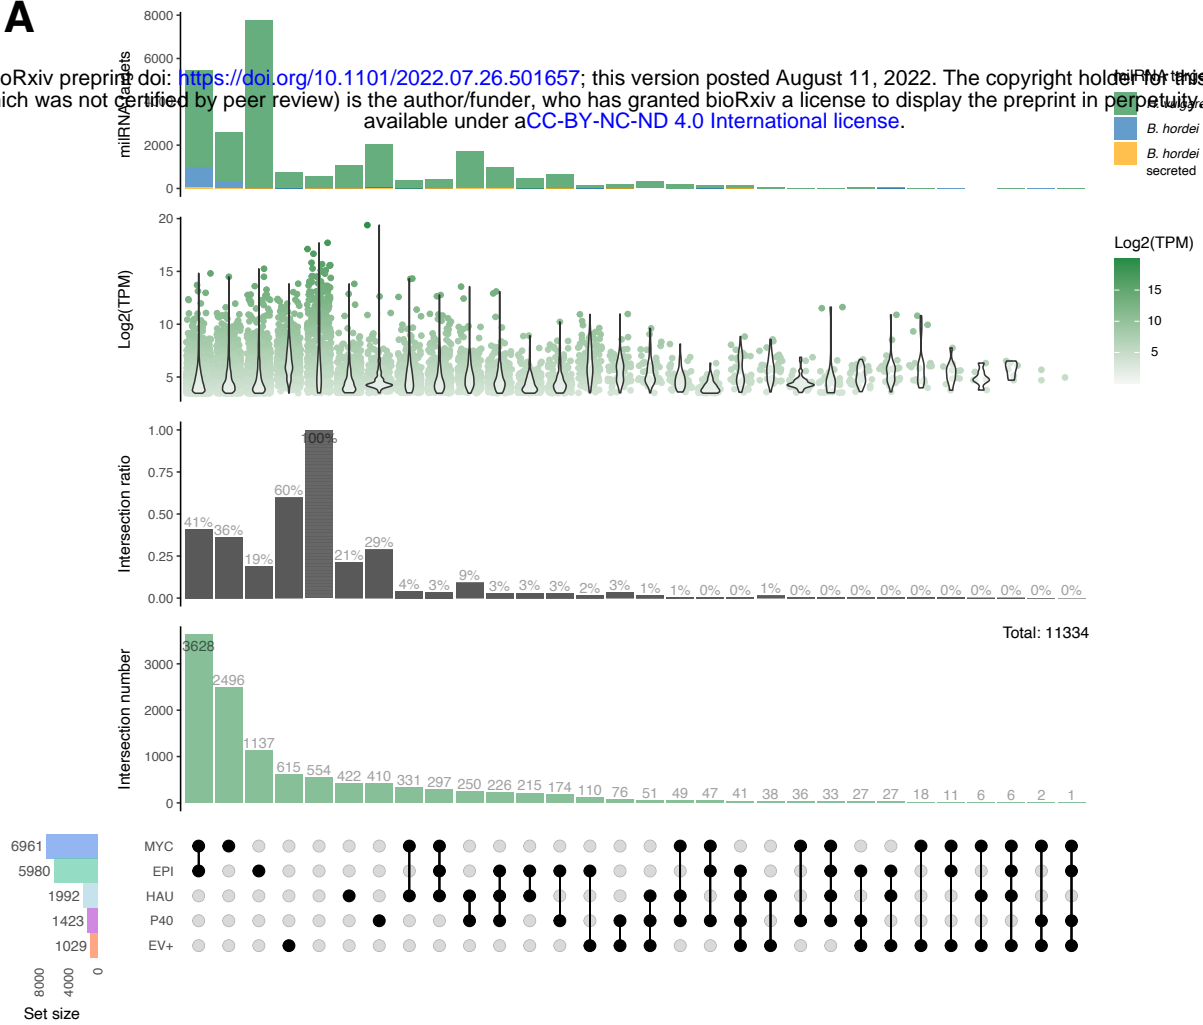**B**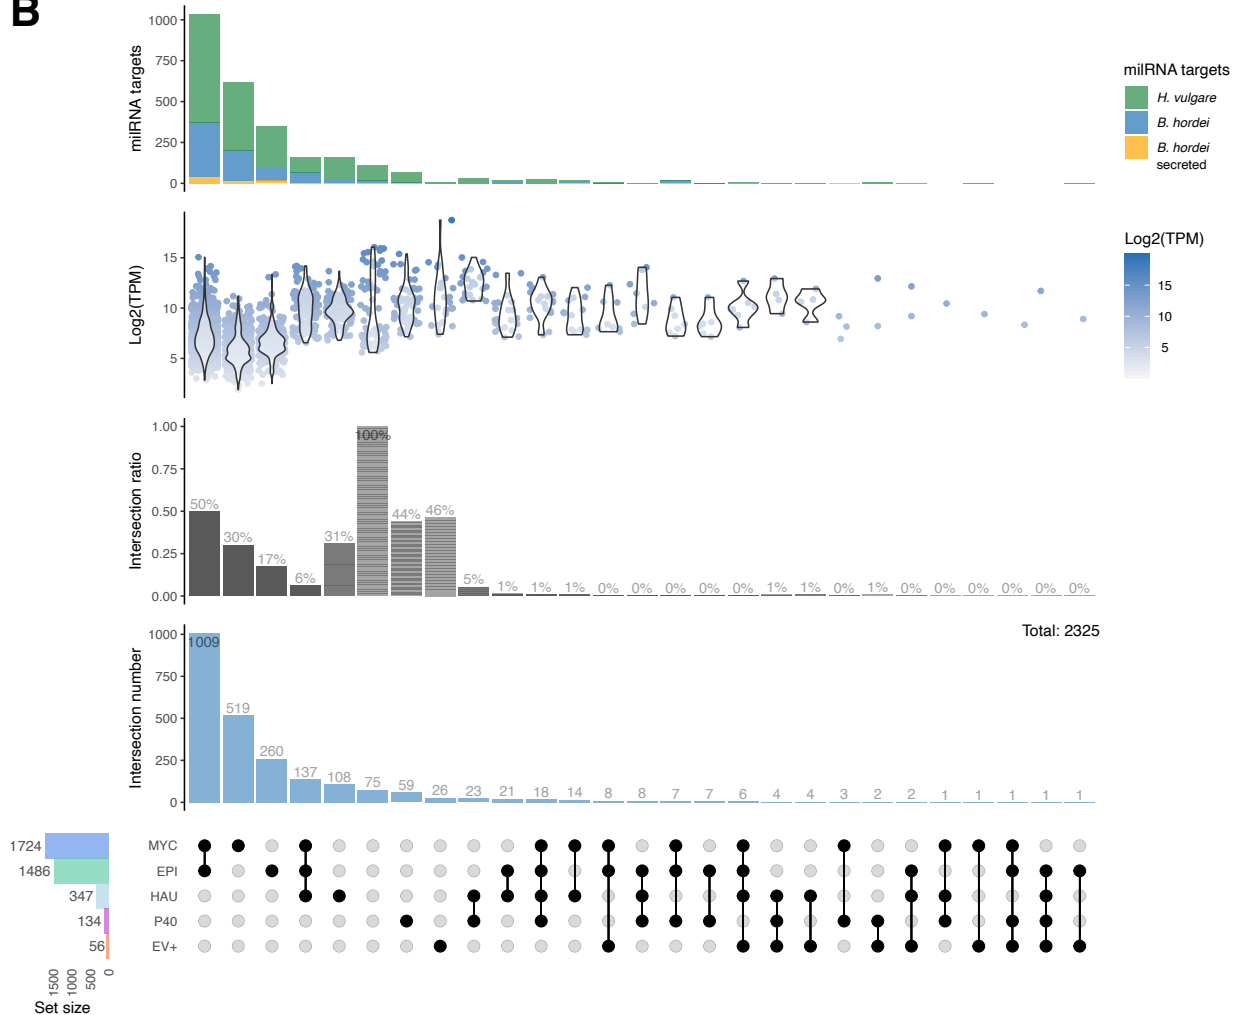

**Figure 4. Large sets of miRNAs exhibit site-specific distribution.** We calculated site-specific abundance in MYC, EPI, HAU, P40, and EV+ samples for **(A)** *H. vulgare* and **(B)** *B. hordei* using WGCNA and assigned miRNAs to samples exhibiting > 2.5-fold enrichment over the average. The bottom panels indicate the set sizes of miRNAs in the respective samples (a Graph Cdf), blue, epiphytic fungal mycelium (MYC); green, infected epidermis without mycelium (EPI); light blue, fungal haustoria (HAU); purple, microsomes of the epidermis without haustoria (P40); orange, apoplastic extracellular vesicles (EV+). The dots indicate the samples contributing to the respective interaction sets. The second panels from the bottom are bar graphs of the intersection numbers, which are the numbers of miRNAs in the exclusive intersections. The third panels from the bottom show the normalized abundance of the miRNAs in the respective interaction sets as violin plot; the maximum TPM value across samples was used for each data point. The top panels are stacked bar charts of the sum of predicted miRNA target genes in *B. hordei* (blue) and *H. vulgare* (green); *B. hordei* genes encoding a secreted protein are shown in orange.

**A**

bioRxiv preprint doi: <https://doi.org/10.1101/2022.07.26.501657>; this version posted August 11, 2022. The copyright holder for this preprint (which was not certified by peer review) is the author/funder, who has granted bioRxiv a license to display the preprint in perpetuity. It is made available under a [CC-BY-NC-ND 4.0 International license](https://creativecommons.org/licenses/by-nc-nd/4.0/).

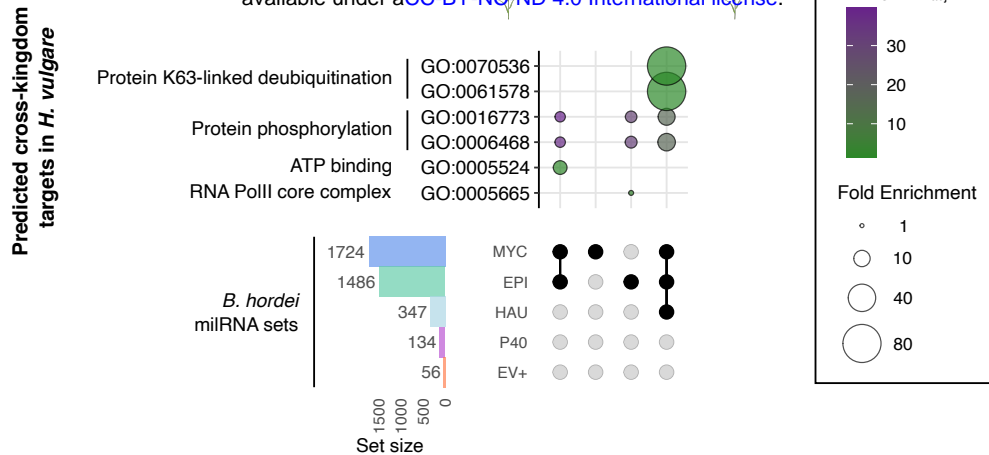**B**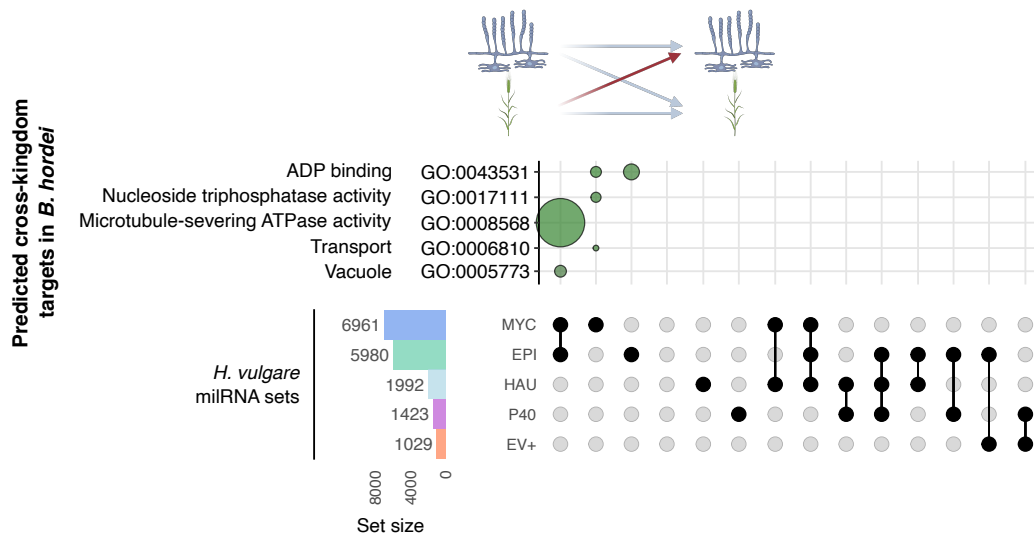

**Figure 5. GO enrichment analysis of putative cross-kingdom milRNA targets.** We determined all putative targets of the sets of *B. hordei* and *H. vulgare* milRNAs via psRNAtarget (Dai and Zhao 2011). We used ShinyGO v0.75 (Ge *et al.* 2020) to calculate enriched gene ontology (GO) terms in all milRNA target sets and summarized redundant GO terms with EMBL-EBI QuickGO (<https://www.ebi.ac.uk/QuickGO/>) on GO version 2022-04-26 and REVIGO (Supek *et al.* 2011). **(A)** GO enrichment terms found in putative cross-kingdom targets of *B. hordei* milRNAs in *H. vulgare*. **(B)** GO enrichment terms found in putative cross-kingdom targets of *H. vulgare* milRNAs in *B. hordei*. The GO terms and identifiers are indicated next to the bubble plots. Bubble size indicates fold enrichment of the term in the respective subset, fill color indicates  $-\log_{10}$  of the FDR-adjusted enrichment  $P$  value. The milRNA subsets are indicated below the bubble plots (see Figure 4 for all subsets). The icons on top of the plot were created with bioRender.com; the blue mycelium indicates *B. hordei* and the green plant barley.

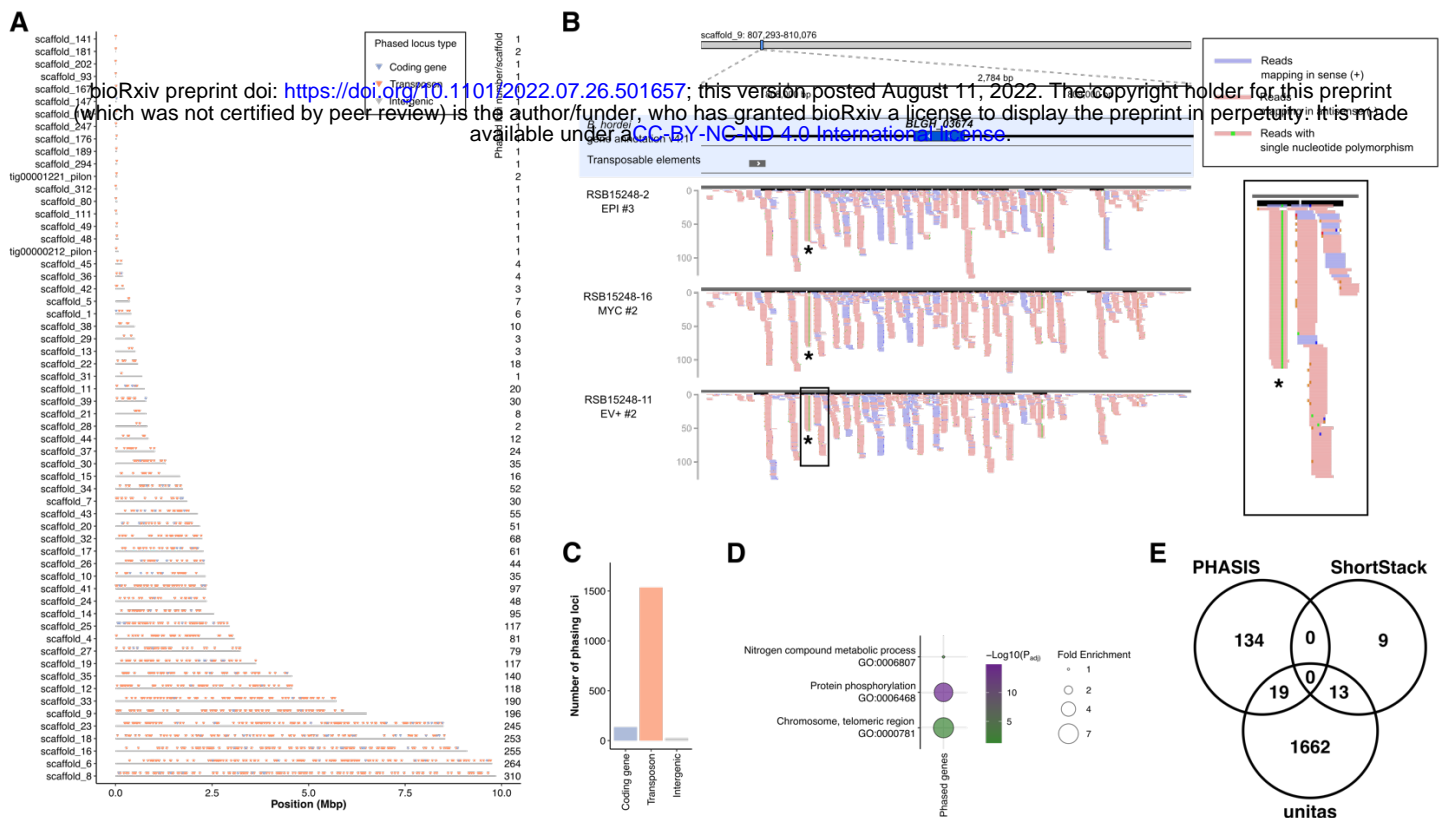

**Figure 6. Transposable elements and Sgk2 kinases are subject to phasing in *B. hordei*.** We identified phasiRNA-rich loci indicative of phasing in the genome of *B. hordei* with ShortStack pipeline v3.8.5-1 (Johnson *et al.* 2016), the PHASIS pipeline (Kakrana *et al.* 2017), and unitas v1.7.0 (Gebert *et al.* 2017). **(A)** Global distribution of predicted phasing loci in the genome of *B. hordei* DH14 (Frantzeskakis *et al.* 2018). The x-axis shows the genome position in mega base pairs (Mbp) and the scaffolds are indicated on the y-axis. Triangles denote loci in which phasiRNAs were found with unitas. Blue triangles, phasing loci coinciding with annotated coding genes; orange triangles, phasing loci coinciding with transposable elements; grey triangles, intergenic phasing loci. **(B)** Example of one phased locus in *B. hordei*, containing the gene *BLGH\_03674*, the partial open reading frame of a gene encoding a Sgk2 kinase. A subset of representative samples from sites where phasing in this locus was detected is shown (EPI, MYC, and EV+), the full set of samples in Supplementary Figure 12. From top to bottom, the position on the scaffold, scaffold name and window, gene and transposable element annotations, and sample names are indicated. Red lines indicate reads mapping in sense orientation of the displayed sequence window; blue lines show reads mapping in antisense orientation. A zoom-in is shown on the right. The putative trans-activating RNA (tasiRNA) is indicated with an asterisk. The figure was generated after inspection with Integrative Genome Viewer (IGV; (Robinson *et al.* 2017)). **(C)** Bar graph summarizing the number of phasing loci types. The x-axis indicates the locus type, i.e., coding gene, transposon, or intergenic; the y-axis shows the number of loci. **(D)** GO enrichment of phased coding genes was calculated with ShinyGO v0.75 (Ge *et al.* 2020); terms were summarized to non-redundant GO terms with EMBL-EBI QuickGO (<https://www.ebi.ac.uk/QuickGO/>) on GO version 2022-04-26 and REVIGO (Supek *et al.* 2011). The bubble size indicates fold enrichment of the term in the respective subset, fill color indicates  $-\log_{10}$  of the FDR-adjusted enrichment  $P$  value. **(E)** A Venn diagram summarizing the overlap of discovered phasing loci with the three methods.
